# Supplementary material for: Association Between ADHD and Obesity: A Systematic Review and Meta-Analysis
Source: Atypon-hosted journal article supplement (doi:10.1176/appi.ajp.2015.15020266), 2015-08-28
Supplement: appi.ajp.2015.15020266.ds001.pdf [file appi.ajp.2015.15020266.ds001.pdf]

## SUPPLEMENTAL MATERIAL

### **Appendix A1. DETAILS ON SEARCH METHODS AND SYSTEMATIC REVIEW PROCEDURES**

#### **Search terms for each electronic database**

##### **Pubmed**

(ADHD OR adhd OR attention deficit disorder with hyperactivity OR syndrome hyperkinetic OR hyperkinetic syndrome OR hyperactivity disorder OR hyperactive child syndrome OR childhood hyperkinetic syndrome OR attention deficit hyperactivity disorders OR attention deficit hyperactivity disorder OR attention deficit hyperactivity disorder OR addh OR overactive child syndrome OR attention deficit hyperkinetic disorder OR hyperkinetic disorder OR attention deficit disorder hyperactivity OR child attention deficit disorder OR hyperkinetic syndromes OR syndromes hyperkinetic OR hyperkinetic syndrome childhood) AND (Obes\* OR Overweight OR BMI OR Body Mass Index OR Quetelet's index OR Body size OR Adiposity)

MeSH terms were used where appropriate

Results search 31.08.2014: **768 hits**

##### **Ovid databases (Ovid MEDLINE®, Biological Abstracts®, EMBASE Classic+EMBASE, PsycINFO):**

(ADHD OR adhd OR attention deficit disorder with hyperactivity OR syndrome hyperkinetic OR hyperkinetic syndrome OR hyperactivity disorder OR hyperactive child syndrome OR childhood hyperkinetic syndrome OR attention deficit hyperactivity disorder OR addh OR overactive child syndrome OR attention deficit hyperkinetic disorder OR hyperkinetic disorder OR attention deficit disorder hyperactivity OR child attention deficit disorder OR hyperkinetic syndromes OR syndromes hyperkinetic OR hyperkinetic syndrome childhood OR Attention deficit disorder OR ((atteni\$) adj3 (deficit\$ OR disorder\$ or hyperactiv\$ OR hyper?activ\$ OR adhd OR addh OR ad??hd)) OR ((hyperkin\$ OR hyper?kin\$) adj3 (deficit\$ OR disorder\$ OR hkd))) AND (Obesity OR obese OR Overweight OR BMI OR Body Mass Index OR Quetelet index OR Body size OR Adiposity)

Results search 31.08.2014: **1664**

##### **Web of knowledge (BIOSIS Previews, Inspec®, Science Citation Index Expanded (SCI-Expanded), Social Sciences Citation Index (SSCI), Arts & Humanities Citation Index (A&HCI), Conference Proceedings Citation Index - Science (CPCI-S), Conference Proceedings Citation Index - Social Sciences & Humanities (CPCI-SSH), CABI: CAB Abstracts® and Global Health®, Food Science and Technology Abstracts (FSTA)®)**

(ADHD OR adhd OR attention deficit disorder with hyperactivity OR syndrome hyperkinetic OR hyperkinetic syndrome OR hyperactivity disorder OR hyperactive child syndrome OR childhood hyperkinetic syndrome OR attention deficit hyperactivity disorder OR adhd attention deficit hyperactivity disorder OR addh OR overactive child syndrome OR attention deficit hyperkinetic disorder OR hyperkinetic disorder OR attention deficit disorder hyperactivity OR child attention deficit disorder OR hyperkinetic syndromes OR syndromes hyperkinetic OR hyperkinetic syndrome childhood) #1 (Obesity OR Obese OR Overweight OR BMI OR Body Mass Index OR Quetelet's index OR Body size OR Adiposity) #2

Results search 31.08.2014: **3345**

### **ERIC**

(ADHD OR adhd OR attention deficit disorder with hyperactivity OR syndrome hyperkinetic OR hyperkinetic syndrome OR hyperactivity disorder OR hyperactive child syndrome OR childhood hyperkinetic syndrome OR attention deficit hyperactivity disorders OR attention deficit hyperactivity disorder OR attention deficit hyperactivity disorder OR addh OR overactive child syndrome OR attention deficit hyperkinetic disorder OR hyperkinetic disorder OR attention deficit disorder hyperactivity OR child attention deficit disorder OR hyperkinetic syndromes OR syndromes hyperkinetic OR hyperkinetic syndrome childhood) AND (Obesity OR Overweight OR BMI OR Body Mass Index OR Quetelet's index OR Body size OR Adiposity)

Results search 31.08.2014: **41**

### **CINAHL plus**

(ADHD OR adhd OR attention deficit disorder with hyperactivity OR syndrome hyperkinetic OR hyperkinetic syndrome OR hyperactivity disorder OR hyperactive child syndrome OR childhood hyperkinetic syndrome OR attention deficit hyperactivity disorders OR attention deficit hyperactivity disorder OR attention deficit hyperactivity disorder OR addh OR overactive child syndrome OR attention deficit hyperkinetic disorder OR hyperkinetic disorder OR attention deficit disorder hyperactivity OR child attention deficit disorder OR hyperkinetic syndromes OR syndromes hyperkinetic OR hyperkinetic syndrome childhood) AND (Obesity OR Overweight OR BMI OR Body Mass Index OR Quetelet's index OR Body size OR Adiposity)

Results search 31.08.2014: **81**

After merging and removing duplicates across databases using Endnote X6 with the function "remove duplicates": **4667 hits**

### **Other resources searched**

We searched relevant studies in the *Journal of the American Academy of Child and Adolescent Psychiatry*, *Journal of Child Psychology and Psychiatry*, *European Child and Adolescent Psychiatry*, *the American Journal of Psychiatry*, *International Journal of Obesity, Obesity, and Pediatrics*. We also searched the proceedings of conferences such as the annual meeting of the *American Academy of Child and Adolescent Psychiatry* and the *International Congress on Obesity*. We also contacted members of the *European Network for Hyperkinetic Disorders* (Eunethydis) at the 22<sup>nd</sup> Eunethydis meeting (Budapest, 29/9/2011-2/10/2011) and at the 23<sup>rd</sup> Eunethydis meeting (Prague, 3/10/2013-6/10/2013) as well as participants to the 2<sup>nd</sup> International ADHD Conference (Barcelona 23/5/2012-25/5/2012) and to the 3<sup>rd</sup> International ADHD Conference (Istanbul, 21/5/2014-24/5/2014) and asked them to provide any unpublished data on the prevalence of obesity in individuals with ADHD.

## **Method of addressing articles published in languages other than English**

One or more of the investigators of the present meta-analysis are fluent in English, French, Italian, Portuguese or Spanish. If needed, authors of potentially relevant papers published in languages not spoken by the investigators were asked to provide details of their study in English or in any other language spoken by the investigators.

### ***Selection of studies***

We used two stages: 1) Two investigators (SC, and CRMM) independently and blindly screened titles and abstracts of all non-duplicated papers and excluded those clearly not pertinent. A final list was agreed with discrepancies resolved by consensus between the two authors for 42 out of 4667 screened papers; CM-P was arbitrator for 21 additional references. 2) The full-text versions of the articles passing stage 1 were assessed for eligibility by SC and CRMM, independently and blindly. Discrepancies for three papers were resolved by consensus between the two authors; CM-P was arbitrator for an additional study. Data from multiple reports of the same study were linked together.

### ***Data extraction***

Two investigators (SC and CRMM) independently and blindly performed extraction of data relevant to the aims of the present meta-analysis; discrepancies, which occurred for about 12% of extracted data, were resolved by consensus between the two authors. Data were extracted and inserted in an Excel sheet. Data extracted included:

1. Publication detail: year and language of publication, country where the study was conducted;
2. Design: type of study (cross-sectional, case-control, cohort, etc.); study temporality (prospective, retrospective); patient enrolment (consecutive, non-consecutive); setting (clinical vs. population-based study);
3. Study participants details: number, mean age (SD), gender distribution, SES and ethnicity of participants with and without ADHD; characteristics of participants without ADHD (healthy comparisons, comparisons with psychiatric disorders other than ADHD, other); psychiatric comorbidities of individuals with and without ADHD (type and prevalence); method to establish the diagnosis of ADHD (self-reported diagnosis, diagnosis recorded in medical files/registry, structured or semi-structured interview according to DSM (III, III-R, IV, IV-TR) or ICD (ICD-10 or previous versions) criteria); medication status of individuals with and without ADHD (type of medication and percentage of treated participants, during and prior to the study);
4. Outcome measure: method used to define obesity/overweight (self-reported diagnosis, diagnosis in medical file/registry, cut-off in BMI calculated from self-reported or measured height and weight); prevalence (unadjusted and, if reported, adjusted) of obesity and, if reported, of overweight in individuals with and without ADHD;
5. Covariates included in the adjusted (by the study authors) odds ratios effect sizes of obesity prevalence, such as SES and psychiatric comorbidities.

When not reported, we contacted study authors to gather data for the analyses, including ORs in medicated and medication-naïve ADHD participants.

### *Assessment of study quality and bias*

SC and CRMM independently and blindly performed the assessment of study quality and bias, including confounding. Study quality was rated using the Newcastle-Ottawa Scale, as recommended by the Cochrane collaboration. For items included in this scale, see section A2, Supplement. Discrepancies in the ratings (18% of the total items) were resolved by consensus.

## **Appendix A2. ITEMS OF THE NEWCASTLE-OTTAWA QUALITY ASSESSMENT SCALE**

### ***CASE CONTROL STUDIES***

#### **Selection**

- 1) Is the case definition adequate?
  - a) yes, with independent validation
  - b) yes, e.g., record linkage or based on self reports
  - c) no description
- 2) Representativeness of the cases
  - a) consecutive or obviously representative series of cases
  - b) potential for selection biases or not stated
- 3) Selection of Controls
  - a) community controls
  - b) hospital controls
  - c) no description
- 4) Definition of Controls
  - a) no history of disease (endpoint)
  - b) no description of source

#### **Comparability**

- 1) Comparability of cases and controls on the basis of the design or analysis
  - a) study controls for \_\_\_\_\_ (Select the most important factor.)
  - b) study controls for any additional factor (This criteria could be modified to indicate specific control for a second important factor.)

#### **Exposure**

- 1) Ascertainment of exposure
  - a) secure record (e.g., surgical records)
  - b) structured interview where blind to case/control status
  - c) interview not blinded to case/control status
  - d) written self report or medical record only
  - e) no description
- 2) Same method of ascertainment for cases and controls
  - a) yes
  - b) no
- 3) Non-Response rate
  - a) same rate for both groups
  - b) non respondents described
  - c) rate different and no designation

## *COHORT STUDIES*

### **Selection**

- 1) Representativeness of the exposed cohort
  - a) truly representative of the average \_\_\_\_\_ (describe) in the community
  - b) somewhat representative of the average \_\_\_\_\_ in the community
  - c) selected group of users e.g., nurses, volunteers
  - d) no description of the derivation of the cohort
- 2) Selection of the non exposed cohort
  - a) drawn from the same community as the exposed cohort
  - b) drawn from a different source
  - c) no description of the derivation of the non exposed cohort
- 3) Ascertainment of exposure
  - a) secure record (e.g., surgical records)
  - b) structured interview
  - c) written self report
  - d) no description
- 4) Demonstration that outcome of interest was not present at start of study
  - a) yes
  - b) no

### **Comparability**

- 1) Comparability of cohorts on the basis of the design or analysis
  - a) study controls for \_\_\_\_\_ (select the most important factor)
  - b) study controls for any additional factor (This criteria could be modified to indicate specific control for a second important factor.)

### **Outcome**

- 1) Assessment of outcome
  - a) independent blind assessment
  - b) record linkage
  - c) self-report
  - d) no description
- 2) Was follow-up long enough for outcomes to occur
  - a) yes (select an adequate follow up period for outcome of interest)
  - b) no
- 3) Adequacy of follow up of cohorts
  - a) complete follow up - all subjects accounted for
  - b) subjects lost to follow up unlikely to introduce bias - small number lost - > \_\_\_\_ % (select an adequate %) follow up, or description provided of those lost)
  - c) follow up rate < \_\_\_\_% (select an adequate %) and no description of those lost
  - d) no statement

## Appendix A3. DETAILS ON ANALYSES

### Sub-group meta-analyses

The subgroup meta-analysis comprising the 30 studies in children/adolescents found a statistically significant pooled OR for obesity in children with ADHD compared with controls (OR=1.20, 95% CI=1.05-1.37;  $z=2.63$ ,  $p=0.009$ ) (Figure S1). Heterogeneity was significant (chi-squared=164.26,  $I^2=82.3\%$ ,  $df=29$ ,  $p<0.0005$ ). Egger's test for publication bias was not significant ( $t=0.95$ ,  $df=29$ ,  $p=0.349$ ). Excluding the outlier study by Gungor et al. (2013), results remained significant: OR=1.18, 95% CI=1.034-1.348;  $z=2.46$ ,  $p=0.014$ ). Heterogeneity was significant (chi-squared=154.01,  $I^2=81.8\%$ ,  $df=28$ ,  $p<0.0005$ ). Egger's test for publication bias was not significant ( $t=1.37$ ,  $df=28$ ,  $p=0.181$ ).

The subgroup meta-analysis comprising the 11 studies in adults found a statistically significant pooled OR for obesity in individuals with ADHD compared with controls (OR=1.55, 95% CI=1.32-1.81;  $z=5.45$ ,  $p<0.0005$ ) (Figure S2). The degree of heterogeneity was small and not significant (chi-squared=13.90,  $I^2=28.1\%$ ,  $df=10$ ,  $p=0.178$ ). Egger's test for publication bias was not significant ( $t=1.79$ ,  $df=10$ ,  $p=0.106$ ).

The sub-group meta-analysis comprising the 25 studies based on a formal diagnosis of ADHD via psychiatric interview found a statistically significant pooled OR for obesity in individuals with ADHD compared with controls (OR=1.36, 95% CI=1.12-1.66;  $z=3.07$ ,  $p=0.002$ ) (Figure S3). Heterogeneity was significant (chi-squared=81.68,  $I^2=70.6\%$ ,  $df=24$ ,  $p<0.0005$ ). Egger's test for publication bias was not significant ( $t=0.44$ ,  $df=24$ ,  $p=0.66$ ).

The sub-group meta-analysis including only the 24 studies where height and weight were directly measured found a statistically significant pooled OR for obesity in individuals with ADHD compared with controls (OR=1.32, 95% CI=1.06-1.66;  $z=2.43$ ,  $p=0.015$ ) (Figure S4). The degree of heterogeneity was significant (chi-squared=110.81,  $I^2=79.2\%$ ,  $df=23$ ,  $p<0.0005$ ). The Egger's test for publication bias was significant ( $t=2.44$ ,  $df=23$ ,  $p=0.023$ ). After removing the outlier study by Gungor et al. (2013), the results did not change substantially (OR=1.3, 95% CI=1.02-1.6;  $z=2.2$ ,  $p=0.003$ ). The degree of heterogeneity was significant (chi-squared=100.0,  $I^2=78\%$ ,  $df=22$ ,  $p<0.0001$ ). The Egger's test for publication bias was significant ( $t=2.4$ ,  $df=22$ ,  $p=0.046$ ).

The sub-group meta-analysis comprising the 26 population-based studies found a statistically significant pooled OR for obesity in individuals with ADHD compared with controls (OR=1.24, 95% CI=1.10-1.39;  $z=3.46$ ,  $p=0.001$ ) (Figure S5). Heterogeneity was significant (chi-squared=146.77,  $I^2=83.0\%$ ,  $df=25$ ,  $p<0.0001$ ). Egger's test for publication bias was not significant ( $t=1.01$ ,  $df=25$ ,  $p=0.320$ ).

The sub-group meta-analysis including only the 15 clinical studies found a statistically significant pooled OR for obesity in individuals with ADHD compared with controls (OR=1.61, 95% CI=1.10-2.35;  $z=2.43$ ,  $p=0.015$ ) (Figure S6). The degree of heterogeneity was significant (chi-squared=43.83,  $I^2=68.1\%$ ,  $df=14$ ,  $p<0.0005$ ). The Egger's test for publication bias was not significant ( $t=0.86$ ,  $df=14$ ,  $p=0.407$ ). After removing the outlier study by Gungor et al. (2013), the results did not change substantially (OR=1.472, 95% CI=1.035-2.094;  $z=2.15$ ,  $p=0.031$ ). The degree of heterogeneity was significant (chi-squared=35.22,  $I^2=63.1\%$ ,  $df=13$ ,  $p=0.001$ ). The Egger's test for publication bias was not significant ( $t=0.15$ ,  $df=13$ ,  $p=0.883$ ).

The sub-group meta-analysis focusing on studies with a formal diagnosis of ADHD and directly measured height and weight included 16 studies. We included in this analysis also the study by

Eschenbeck et al. (2009) that was based on obesity diagnosis as per ICD-10 as reported in medical files since the authors confirmed that height and weight were directly measured, rather than reported by patients. We also contacted the corresponding author of another study [Chen et al. (2013)] that was also based on a diagnosis of obesity reported in medical files, as per ICD-9 CM, and asked him if height and weight had been directly measured rather than reported. Although it is likely that, as in the study by Eschenbeck et al. (2009), height and weight were directly measured, since this contact was not successful, we decided to run a preliminary analysis without the study by Chen et al. The pooled OR was 1.42 (95% CI=1.06-1.91,  $z=2.32$ ,  $p=0.020$ ). Heterogeneity was significant (chi-squared=40.12,  $I^2=62.6\%$ ,  $df=15$ ,  $p<0.0005$ ) and test of publication bias was not significant ( $t=0.29$ ,  $df=15$ ,  $p=0.774$ ) However, including the study by Chen et al., results did not change significantly: OR=1.47, 95% CI=1.12-1.93;  $z=2.74$ ,  $p=0.006$ ; heterogeneity: chi-squared=42.26,  $I^2=62.1\%$ ,  $df=16$ ,  $p<0.0005$ ); test of publication bias:  $t=0.44$ ,  $df=16$ ,  $p=0.667$  (Figure S7). Excluding both the study by Chen et al. (2013) and the outlier study by Gungor et al. (2013), findings remained significant: OR=1.34, 95% CI=1.021-1.760;  $z=2.11$ ,  $p=0.035$ ; heterogeneity: chi-squared=31.17,  $I^2=55.1\%$ ,  $df=14$ ,  $p=0.005$ ; test of publication bias:  $t=-0.23$ ,  $df=14$ ,  $p=0.823$ .

The meta-analysis of the 22 studies of overweight found a statistically significant pooled OR for overweight in individuals with ADHD compared with controls (OR=1.17, 95% CI=1.01-1.36;  $z=2.04$ ,  $p=0.042$ ) (Figure S8), with a high and significant degree of heterogeneity (chi-squared=94.69,  $I^2=77.8\%$ ,  $df=21$ ,  $p<0.0005$ ) and a non significant Egger's test for publication bias ( $t=2.44$ ,  $df=21$ ,  $p=0.024$ ). Results did not change substantially after removing the study by Gungor et al. (2013) identified as an outlier (OR=1.2, 95% CI=1.01-1.4;  $z=2.3$ ,  $p=0.02$ ).

The sub-group meta-analysis focusing on unmedicated subjects from 12 studies found a statistically significant pooled OR for obesity in individuals with ADHD compared with controls (OR=1.43, 95% CI=1.23-1.67;  $z=4.59$ ,  $p<0.005$ ) (Figure 4a). The degree of heterogeneity was significant (chi-squared=21.15,  $I^2=48.0\%$ ,  $df=11$ ,  $p=0.032$ ). The Egger's test for publication bias was not significant ( $t= -0.29$ ,  $df=11$ ,  $p=0.781$ ).

The sub-group meta-analysis focusing on medicated subjects from 12 studies did not find a statistically significant pooled OR for obesity in individuals with ADHD compared with controls (OR=1.00, 95% CI=0.87-1.15;  $z=0.05$ ,  $p=0.964$ ) (Figure 4b). The degree of heterogeneity was significant (chi-squared=22.89,  $I^2=51.9\%$ ,  $df=11$ ,  $p=0.018$ ). The Egger's test for publication bias was not significant ( $t=-1.73$ ,  $df=11$ ,  $p=0.115$ ).

### Meta-regression analysis

We used meta-analysis regression to test for effects of potentially confounding covariates. None of the covariates included in the model significantly predicted the study effect sizes, as summarized in the following:

Year of study publication:  $t(39df)=0.4$ ;  $p=0.7$

Number of participants with ADHD:  $t(39df)=0.8$ ;  $p=0.4$

Number of participants without ADHD:  $t(39df)=0.8$ ;  $p=0.4$

Age of participants:  $t(39df)=1.7$ ;  $p=0.1$

Gender:  $t(39df)=0.3$ ;  $p=0.8$

Study setting (clinical or population-based):  $t(39df)=1.1$ ;  $p=0.3$

Newcastle-Ottawa Scale score:  $t(39df)=0.7$ ;  $p=0.5$



We performed an additional meta-regression analysis to test the effect of study country. As showed in Supplemental Table S1, there were 17 different countries. After excluding the outlier paper by Gungor et al. (2013), there was only a trend, not statistically significant, for the effect of study country. ( $F(15,24)=2.10$ ,  $\text{Prob}>F=0.0506$ ).

The ORs for each country were as follows:

| Study #       | ES    | [95% Conf. Interval] |       |
|---------------|-------|----------------------|-------|
| -----         |       |                      |       |
| Iran          |       |                      |       |
| 1             | 1.440 | 0.470                | 4.380 |
| 34            | 0.640 | 0.100                | 4.140 |
| Sub-total     |       |                      |       |
| D+L pooled ES | 1.162 | 0.446                | 3.027 |
| -----         |       |                      |       |
| USA           |       |                      |       |
| 2             | 2.710 | 1.210                | 6.060 |
| 3             | 3.800 | 1.640                | 8.810 |
| 5             | 0.930 | 0.710                | 1.220 |
| 8             | 1.440 | 1.060                | 1.950 |
| 9             | 1.490 | 0.560                | 4.020 |
| 15            | 1.360 | 1.190                | 1.560 |
| 20            | 1.400 | 1.020                | 1.910 |
| 22            | 1.190 | 1.120                | 1.270 |
| 24            | 1.450 | 1.190                | 1.770 |
| 26            | 1.490 | 1.120                | 1.990 |
| 28            | 1.400 | 1.170                | 1.700 |
| 33            | 2.650 | 1.090                | 6.450 |
| 35            | 1.160 | 1.020                | 1.310 |
| 38            | 1.100 | 0.650                | 1.870 |
| Sub-total     |       |                      |       |
| D+L pooled ES | 1.322 | 1.201                | 1.455 |
| -----         |       |                      |       |
| Qatar         |       |                      |       |
| 4             | 0.580 | 0.420                | 0.800 |
| Sub-total     |       |                      |       |
| D+L pooled ES | 0.580 | 0.420                | 0.800 |
| -----         |       |                      |       |
| France        |       |                      |       |
| 6             | 0.550 | 0.070                | 4.120 |
| 14            | 1.980 | 0.680                | 5.780 |
| Sub-total     |       |                      |       |
| D+L pooled ES | 1.416 | 0.470                | 4.269 |
| -----         |       |                      |       |
| Taiwan        |       |                      |       |
| 7             | 2.060 | 1.260                | 3.350 |
| Sub-total     |       |                      |       |
| D+L pooled ES | 2.060 | 1.260                | 3.350 |
| -----         |       |                      |       |
| Germany       |       |                      |       |
| 10            | 2.370 | 1.310                | 4.290 |

|               |  |        |       |         |
|---------------|--|--------|-------|---------|
| 12            |  | 1.370  | 0.680 | 2.770   |
| 13            |  | 1.430  | 1.290 | 1.580   |
| 18            |  | 0.510  | 0.160 | 1.620   |
| 19            |  | 2.420  | 0.240 | 24.480  |
| 27            |  | 1.250  | 0.530 | 2.940   |
| 37            |  | 1.560  | 0.660 | 3.680   |
| Sub-total     |  |        |       |         |
| D+L pooled ES |  | 1.445  | 1.265 | 1.650   |
| -----         |  |        |       |         |
| Israel        |  |        |       |         |
| 11            |  | 0.400  | 0.160 | 0.970   |
| Sub-total     |  |        |       |         |
| D+L pooled ES |  | 0.400  | 0.162 | 0.985   |
| -----         |  |        |       |         |
| Turkey        |  |        |       |         |
| 16            |  | 30.100 | 4.060 | 223.010 |
| Sub-total     |  |        |       |         |
| D+L pooled ES |  | 30.100 | 4.061 | 223.083 |
| -----         |  |        |       |         |
| Poland        |  |        |       |         |
| 17            |  | 0.900  | 0.430 | 1.890   |
| Sub-total     |  |        |       |         |
| D+L pooled ES |  | 0.900  | 0.429 | 1.887   |
| -----         |  |        |       |         |
| Finland       |  |        |       |         |
| 21            |  | 1.110  | 0.710 | 1.730   |
| Sub-total     |  |        |       |         |
| D+L pooled ES |  | 1.110  | 0.711 | 1.733   |
| -----         |  |        |       |         |
| UK            |  |        |       |         |
| 23            |  | 4.800  | 2.210 | 10.430  |
| 36            |  | 1.070  | 0.830 | 1.370   |
| Sub-total     |  |        |       |         |
| D+L pooled ES |  | 2.163  | 0.498 | 9.388   |
| -----         |  |        |       |         |
| Brazil        |  |        |       |         |
| 25            |  | 5.880  | 0.620 | 55.380  |
| Sub-total     |  |        |       |         |
| D+L pooled ES |  | 5.880  | 0.622 | 55.572  |
| -----         |  |        |       |         |
| Australia     |  |        |       |         |
| 29            |  | 3.880  | 1.100 | 13.670  |
| 40            |  | 0.890  | 0.180 | 4.410   |
| Sub-total     |  |        |       |         |
| D+L pooled ES |  | 2.025  | 0.483 | 8.487   |
| -----         |  |        |       |         |
| Spain         |  |        |       |         |
| 30            |  | 0.810  | 0.730 | 0.880   |
| Sub-total     |  |        |       |         |
| D+L pooled ES |  | 0.810  | 0.738 | 0.889   |
| -----         |  |        |       |         |

|               |  |       |             |
|---------------|--|-------|-------------|
| Netherlands   |  |       |             |
| 31            |  | 1.100 | 0.420 2.820 |
| 39            |  | 0.630 | 0.350 1.130 |
| Sub-total     |  |       |             |
| D+L pooled ES |  | 0.734 | 0.446 1.209 |
| -----         |  |       |             |
| Canada        |  |       |             |
| 32            |  | 1.000 | 0.800 1.300 |
| Sub-total     |  |       |             |
| D+L pooled ES |  | 1.000 | 0.784 1.275 |
| -----         |  |       |             |
| China         |  |       |             |
| 41            |  | 2.860 | 1.700 4.800 |
| Sub-total     |  |       |             |
| D+L pooled ES |  | 2.860 | 1.702 4.806 |
| -----         |  |       |             |

We found a statistically significant pooled OR for overweight in individuals with ADHD compared with controls (OR=1.3, 95% CI: 1.1-1.5;  $z=2.9$ ,  $p=0.004$ ), with a high and significant degree of heterogeneity (chi-squared=186.6,  $I^2=88.2\%$ ,  $df=22$ ,  $p<0.0005$ ) and a non significant Egger's test for publication bias ( $t=1.2$ ,  $df=22$ ,  $p=0.25$ ) (Supplemental Figure 3). Results did not change substantially after removing the study by Gungor et al. (2013) identified as an outlier (OR=1.2, 95% CI: 1.0-1.4;  $z=2.3$ ,  $p=0.02$ ).

**Appendix A4. ANALYSES FROM STUDIES PRESENTING SEPARATE DATA FOR PRIMARY SCHOOL CHILDREN AND ADOLESCENTS.**

There studies presented data separately in primary school children and adolescents.

The first of these studies (Curtin et al., 2008) found a non-significant association in primary school children (6-11 year-old, OR= 0.98; 95% CI= 0.47-2.01) as well as in adolescents (12-19 year-old, OR= 1.24, 95% CI= 0.46-3.30); the second study (Eschenbeck et al., 2009) reported an association shy of statistical significance in children aged 6-8 (OR= 1.24; 95% CI= 0.97-1.58) and a significant association in children aged 9-11 (OR= 1.41; 95% CI= 1.20-1.65) as well as in adolescents (OR= 1.65; 95% CI= 1.40-1.93); the third study (Fliers et al., 2013) did not found any significant association in any of the age groups assessed (5-9 year-old, boys: OR= 0.46; 95% CI= 0.13-1.63, girls: OR= 0.12; 95% CI= 0.02-0.99; 10-12 year-old, boys: OR= 1.39; 95% CI= 0.50-3.88, girls: OR= 4.61; 95% CI= 0.58-36.55; 13-17 year-old, boys: OR= 0.38; 95% CI= 0.11-1.27, girls: OR= 0.13; 95% CI= 0.01-1.40).

**Table S1. Variables Controlled For in Studies Reporting Adjusted Odds Ratios<sup>a</sup>**<sup>a</sup> Measures for socioeconomic status (SES) are indicated when reported in the paper.

| <b>First author (year)</b> | <b>Variables controlled for</b>                                                                                                                                                                                                                                                                                                                       |
|----------------------------|-------------------------------------------------------------------------------------------------------------------------------------------------------------------------------------------------------------------------------------------------------------------------------------------------------------------------------------------------------|
| Byrd (2013)                | Age<br>Race/Ethnicity<br>Low birth weight<br>SES (poverty income ratio)<br>MDD<br>CD                                                                                                                                                                                                                                                                  |
| Chen (2013)                | Age<br>Gender<br>Index year<br>Geographic region                                                                                                                                                                                                                                                                                                      |
| Cortese (2013a)            | MDD<br>AD<br>SUD<br>Ethnicity<br>Individual income                                                                                                                                                                                                                                                                                                    |
| Cortese (2013b)            | SES (Hollingshead and Redlich index)<br>MDD<br>AD<br>SUD                                                                                                                                                                                                                                                                                              |
| de Zwaan (2011)            | Model I:<br>Age<br>Gender<br>Educational level<br>Employment status<br>Marital status<br>Rural/Urban residency<br><br>Model II:<br>Binge eating episodes<br><br>Model III:<br>Purging behaviors<br><br>Model IV:<br>MDD<br>AD<br><br><i>Note: we used data from model I for consistency with most of other studies that presented adjusted models</i> |
| Erhart (2012)              | Age<br>Gender<br><br><i>Note: these factors were controlled for in analyses focusing on overweight (including obesity)</i>                                                                                                                                                                                                                            |

|                  |                                                                                                                                                                                                                                                  |
|------------------|--------------------------------------------------------------------------------------------------------------------------------------------------------------------------------------------------------------------------------------------------|
| Fuemmeler (2011) | Age<br>Gender<br>Race/ethnicity<br>Physical activity<br>Education achieved<br>MDD<br>Alcohol consumption<br>Smoking                                                                                                                              |
| Hanc (2014)      | Birth weight<br>Parent's education<br>Place of residence<br>Income level                                                                                                                                                                         |
| Kim (2014)       | Age<br>Gender<br>Paternal education<br><br>Note: this study provided data only for the analysis focusing on obesity, rather than overweight                                                                                                      |
| Kim (2011)       | Age<br>SES (family income)<br>Ethnicity<br>Family structure<br>Maternal education<br>Household smoking                                                                                                                                           |
| Koshy (2011)     | Maternal smoking during pregnancy<br>Asthma<br>Childhood obesity, overweight<br>Preterm birth<br>Heavy maternal smoking<br>Household member smoking during pregnancy<br>Low birth weight                                                         |
| Linginani (2012) | MDD<br>AD<br>Gender<br>Race/Ethnicity<br>Educational level<br>Family structure<br>Healthcare coverage<br>Poverty level<br>Participation in sport and clubs<br>Daily average TV watching and playing videogames<br>Family member's smoking status |
| Pagoto (2009)    | Model I:<br>Demographics<br>Smoking status<br><br>Model II:<br>MDD                                                                                                                                                                               |

|                          |                                                                                                                                                                                                                              |
|--------------------------|------------------------------------------------------------------------------------------------------------------------------------------------------------------------------------------------------------------------------|
|                          | Demographics<br>Smoking status<br><br>Model III: BED<br>Demographics<br>Smoking status<br><br>Note: the first model was used in the meta-analysis for consistency with most of the other studies that presented adjusted ORs |
| Pauli-Pott (2013)        | Age<br>Gender                                                                                                                                                                                                                |
| Phillips (2014)          | Age<br>Gender<br>Race/Ethnicity<br>Mother's Education<br>Poverty-to-Income Ratio<br>Birthweight                                                                                                                              |
| Smith (unpublished 2008) | Age<br>Gender<br>SES<br>ADHD Medications<br>Other Medication<br>Emotional Disorder/Anxiety<br>CD/Physical Aggression                                                                                                         |
| Waring (2008)            | Age<br>Gender<br>Race/Ethnicity<br>SES<br>Depression or Anxiety                                                                                                                                                              |
| White (2012)             | Gender<br>Height<br>Father's social class and maternal education<br>Cognitive ability<br>Birth weight<br>BMI of both parents                                                                                                 |

Footnote: Full study references are reported in the Reference section in the main text.

AD: Anxiety Disorder; ADHD: Attention Deficit Hyperactivity Disorder; BMI: Body Mass Index; BED: Binge Eating Disorder; CD: Conduct Disorder; MDD: Major Depressive Disorder; ORs: Odds Ratios; SES: Socioeconomic Status; SUD: Substance Abuse Disorder.

**Table S2. Study Characteristics**

<sup>a</sup> Full study reference is reported in the References Section in the main text.

<sup>b</sup> Newcastle Ottawa Scale (NOS) ratings.

<sup>c</sup> Individuals with ADHD were recruited in clinical setting; control sample was population-based.

<sup>d</sup> Data provided by corresponding author of the study.

Abbreviations (in alphabetical order): ADHD: attention deficit hyperactivity disorder; ADHD-RS: ADHD Rating Scale; BMI: body mass index; DSM: Diagnostic and Statistical Manual of Mental Disorders (number refers to the edition); ICD-9 CM: International Classification of Diseases, Ninth Revision, Clinical Modification; ICD-10: International Classification of Diseases, Tenth Revision; MPH: methylphenidate; NA: not applicable; NS: not specified; SDQ: Strengths and Difficulties Questionnaire; WHO: World Health Organization; WURS-k: Wender Utah Rating Scale, German short version.

| First author <sup>a</sup> | Country | Setting               | ADHD            |                         | Males % | Diagnosis ADHD                                 | Medic. status | Controls |                         | Males % | Definition and measure obesity | Definition and measure of over-weight | NOS <sup>b</sup> |
|---------------------------|---------|-----------------------|-----------------|-------------------------|---------|------------------------------------------------|---------------|----------|-------------------------|---------|--------------------------------|---------------------------------------|------------------|
|                           |         |                       | N               | Age (mean, SD or range) |         |                                                |               | N        | Age (mean, SD or range) |         |                                |                                       |                  |
| Azadbakht (39)            | Iran    | Population-based      | 36              | 7 (2)                   | 71      | Interview, DSM-IV criteria                     | NS            | 339      | 10 (1)                  | 41      | Cole et al. method, measured   | NA                                    | 5                |
| Barkley (36)              | USA     | Clinical <sup>c</sup> | 52              | 26.8 (2.8)              | 84      | Interview, Equivalent to DSM-III-R             | NS            | 70       | 27 (0.9)                | 93      | BMI $\geq$ 30, measured        | NA                                    | 5                |
| Beezhold (40)             | USA     | Population-based      | 76 <sup>c</sup> | > 18 years              | NS      | Above threshold Adult Self-Report Scale–v. I.I | NS            | 391      | > 18 years              | NS      | BMI $\geq$ 30, self-reported   | NA                                    | 2                |



Table S2. Study Characteristics (continued)

|                 |        |                       |      |                |       |                                                                   |                                                  |       |                 |       |                                                |                                                    |   |
|-----------------|--------|-----------------------|------|----------------|-------|-------------------------------------------------------------------|--------------------------------------------------|-------|-----------------|-------|------------------------------------------------|----------------------------------------------------|---|
| Bener (20)      | Qatar  | Population-based      | 1331 | 10.63<br>(3.4) | 72.4  | Interview,<br>DSM-IV<br>criteria                                  | NS                                               | 1331  | 10.77<br>(3.4)  | 57.6  | BMI $\geq$<br>95th<br>centile, NS              | BMI $\geq$<br>85th and <<br>95th<br>centile,<br>NS | 4 |
| Byrd (41)       | USA    | Population-based      | 412  | 8-15<br>years  | 66.7  | Self-report                                                       | 44.9%<br>currently<br>medica-<br>ted for<br>ADHD | 2638  | 8-15<br>years   | 46.5  | BMI $\geq$<br>95th<br>centile,<br>measured     | NA                                                 | 8 |
| Caci (11)       | France | Population-based      | 30   | 43.7<br>(8.1)  | 50    | Above<br>threshold<br>Adult Self-<br>Report<br>Scale-v. I.I       | NS                                               | 1107  | 41.82<br>(5.89) | 43.81 | BMI $\geq$ 30,<br>self-<br>reported            | BMI $\geq$ 25<br>and < 30,<br>self-<br>reported    | 5 |
| Chen (42)       | Taiwan | Clinical <sup>c</sup> | 4302 | 5-15<br>years  | 80    | Reported<br>in medical<br>records,<br>according<br>to ICD-9<br>CM | NS                                               | 21510 | 5-15<br>years   | 80    | Reported<br>in medical<br>records,<br>ICD-9 CM | NA                                                 | 4 |
| Cortese<br>(16) | USA    | Population-based      | 340  | > 18<br>years  | 53.06 | Interview,<br>DSM-IV<br>criteria                                  | NS                                               | 34037 | > 18<br>years   | 47.73 | BMI $\geq$ 30,<br>self-<br>reported            | NA                                                 | 7 |
| Cortese<br>(12) | USA    | Clinical              | 24   | 41.3<br>(2.8)  | 100   | Interview,<br>DSM-IV<br>criteria                                  | 5%<br>currently<br>medica-<br>ted for<br>ADHD    | 111   | 41.6<br>(3.2)   | 100   | BMI $\geq$ 30,<br>self-<br>reported            | BMI $\geq$ 25<br>and < 30,<br>self-<br>reported    | 5 |

Table S2. Study Characteristics (continued)

|                 |         |                       |      |              |      |                                       |                             |        |              |      |                                        |                                         |   |
|-----------------|---------|-----------------------|------|--------------|------|---------------------------------------|-----------------------------|--------|--------------|------|----------------------------------------|-----------------------------------------|---|
| Curtin (43)     | USA     | Clinical <sup>c</sup> | 98   | 3-18 years   | 81   | Interview, DSM-IV criteria            | 33 treated with stimulants  | 8276   | 2-19 years   | 44.6 | BMI $\geq$ 95th centile, measured      | BMI $\geq$ 85th centile, measured       | 5 |
| de Zwann (7)    | Germany | Population-based      | 77   | 18-64 years  | 45.5 | Above threshold at WURSK and ADHD-RS  | NS                          | 1556   | 18-64 years  | 46.4 | BMI $\geq$ 30, self-reported           | BMI $\geq$ 25 and $<$ 30, self-reported | 5 |
| Dubnov-Raz (13) | Israel  | Clinical              | 275  | 10.4 (2.4)   | 73   | Interview, DSM-IV-TR criteria         | 49 % treated with MPH       | 51     | 8.8 (2.3)    | 73   | BMI $\geq$ 95th centile, measured      | BMI $\geq$ 85th centile, measured       | 3 |
| Erhart (21)     | Germany | Population-based      | 101  | 11.98 (3.19) | 72.3 | Above threshold at the German ADHD-RS | 37.6% treated with MPH      | 2313   | 12.68 (3.21) | 49.8 | BMI $\geq$ 97th centile, measured      | BMI $\geq$ 90th centile, measured       | 6 |
| Eschenbeck (44) | Germany | Population-based      | 8214 | 6-14 years   |      | ICD-10 diagnosis from insurance files |                             | 148734 | 6-14 years   |      | ICD-10 diagnosis from insurance files  | ICD-10 diagnosis from insurance files   | 3 |
| Faraone (22)    | France  | Population-based      | 36   | 9.63 (1.74)  | 69.4 | Interview, DSM-IV criteria            | Not treated with ADHD drugs | 976    | 9.35 (1.80)  | 51.1 | BMI $\geq$ 95th centile, self-reported | BMI $\geq$ 85th centile, self-reported  | 4 |

**Table S2. Study Characteristics (continued)**

|                |                 |                       |     |                   |        |                                  |                         |       |                   |      |                                   |                                   |   |
|----------------|-----------------|-----------------------|-----|-------------------|--------|----------------------------------|-------------------------|-------|-------------------|------|-----------------------------------|-----------------------------------|---|
| Fliers (45)    | The Netherlands | Clinical <sup>c</sup> | 372 | 5-17 years        | 82.2   | Interview, DSM-IV criteria       | 74% treated with MPH    | 90071 | 4-16 years        | NS   | Cole method, measured             | Cole method, measured             | 6 |
| Fuemmelar (46) | USA             | Population-based      | 901 | NS (young adults) | NS     | Above threshold of ADHD symptoms | NS (young adults)       | 10753 | NS (young adults) | NS   | BMI $\geq$ 30, measured           | BMI $\geq$ 25, measured           | 7 |
| Gungor (8)     | Turkey          | Clinical              | 362 | 9.1 (2.51)        | 85.6   | Interview, DSM-IV criteria       | 16% treated with MPH    | 390   | 9.3 (3.25)        | 80.7 | BMI $\geq$ 95th centile, measured | BMI $\geq$ 85th centile, measured | 4 |
| Hanc (47)      | Poland          | Clinical              | 219 | 11.2 (2.7)        | 100    | Interview, DSM-IV criteria       | 36.1 % treated with MPH | 396   | 10.8 (2.8)        | 100  | BMI $\geq$ 98th centile, measured | BMI $\geq$ 90th centile, measured | 7 |
| Hartmann (48)  | Germany         | Population-based      | 33  | 12.21 (1.6)       | 66.66% | Above threshold of ADHD symptoms | NS                      | 33    | 12.11 (1.52)      | 45.5 | BMI $\geq$ 95th centile, measured | BMI $\geq$ 85th centile, measured | 3 |
| Hubel (49)     | Germany         | Population-based      | 39  | 11.3 (2.2)        | 100    | Interview, DSM-IV criteria       | ADHD medication-naïve   | 30    | 11.6 (1.66)       | 100  | Cole method, measured             | Cole method, measured             | 4 |
| Kessler (37)   | USA             | Population-based      | 186 | 32.2 (8.8)        | 45.7   | Interview, DSM-IV criteria       | NS                      | 8920  | 44.9 (17.5)       | 44.6 | BMI $\geq$ 30, self-reported      | BMI $\geq$ 25, self-reported      | 4 |

**Table S2. Study Characteristics (continued)**

|                |         |                  |      |              |      |                                          |                                |        |              |      |                                   |                                   |   |
|----------------|---------|------------------|------|--------------|------|------------------------------------------|--------------------------------|--------|--------------|------|-----------------------------------|-----------------------------------|---|
| Khalife (50)   | Finland | Population-based | 756  | 7-8 years    | NS   | Above threshold Rutter B2 scale          | NS                             | 111062 | 7-8 years    | NS   | Cole method, self-reported        | Cole method, self-reported        | 4 |
| Kim (52)       | USA     | Population-based | 6070 | 6-17 years   | 71.7 | Self-reported                            | 58.9% treated with stimulants  | 60573  | 6-17 years   | 49.1 | BMI > 95th centile, self-reported | NA                                | 6 |
| Kim (51)       | Korea   | Population-based | 932  | 5-13 years   | NS   | Above threshold DuPaul ADHD Rating Scale | NS                             | 11418  | 5-13 years   | NS   | NA                                | BMI > 85th centile, self-reported | 4 |
| Koshy (53)     | UK      | Population-based | 32   | 5-11 years   | NS   | Self-reported                            | NS                             | 913    | 5-11 years   | NS   | BMI > 1.64 SDS, measured          |                                   | 5 |
| Lingineni (54) | USA     | Population-based | 5529 | 11.98 (5.69) | 71   | Self-reported                            | 68.8 % treated with stimulants | 38510  | 10.46 (6.59) | 49.7 | BMI > 95th centile, self-reported | BMI > 85th centile, self-reported | 6 |
| Menegassi (55) | Brazil  | Clinical         | 22   | 8.95 (2.6)   | 72.7 | Interview, DSM-IV criteria               | ADHD medication-naïve          | 21     | 8.9 (2.66)   | 71.4 | BMI > 2 SDS, measured             | BMI > 1 SDS, measured             | 3 |
| Pagoto (17)    | USA     | Population-based | 242  | ≥ 18 years   | NS   | Interview, DSM-IV criteria               | NS                             | 6495   | ≥ 18 years   | NS   | BMI ≥ 30, self-reported           | BMI ≥ 25, self-reported           | 7 |

Table S2. Study Characteristics (continued)

|                 |                 |                       |                 |             |      |                                                  |                       |                  |             |       |                                   |                                   |   |
|-----------------|-----------------|-----------------------|-----------------|-------------|------|--------------------------------------------------|-----------------------|------------------|-------------|-------|-----------------------------------|-----------------------------------|---|
| Pauli-Pott (56) | Germany         | Clinical              | 207             | 6-12 years  | 84   | Diagnosis in medical records according to ICD-10 | ADHD med.-naïve       | 153              | 6-12 years  | 63.3  | BMI > 97th centile, measured      | NA                                | 5 |
| Phillips (57)   | USA             | Population-based      | 845             | 12-17 years | 71.4 | Self-reported                                    | ADHD medication-naïve | 8141             | 12-17 years | 47    | BMI > 95th centile, self-reported | BMI > 85th centile, self-reported | 6 |
| Poulton (58)    | Australia       | Clinical              | 34              | 7.27 (1.30) | 85.2 | Interview, DSM-IV criteria                       | ADHD med.-naïve       | 241              | 8.54 (1.93) | 43.56 | BMI > 95th centile, self-reported | NA                                | 4 |
| Poulton (59)    | Australia       | Clinical <sup>c</sup> | 65 <sup>d</sup> | 9.2 (2)     | 77.8 | Interview, DSM-IV criteria                       | ADHD medication-naïve | 174 <sup>4</sup> | 6-13 years  | NS    | BMI > 98th centile, measured      | NA                                | 4 |
| Rojo (18)       | Spain           | Population-based      | 7571            | 13-15 years | 55.4 | Above threshold SDQ                              | NS                    | 27832            | 13-15 years | 49.6  | BMI > 97th centile, measured      | BMI > 90th centile, measured      | 3 |
| Semeijn (60)    | The Netherlands | Clinical              | 23              | 68 (4.9)    | 47.8 | Interview, DSM-IV criteria                       | NS                    | 208              | 72 (7.8)    | 39.9  | BMI ≥ 30, measured                | BMI ≥ 25, measured                | 6 |

**Table S2. Study Characteristics (continued)**

|                |        |                  |      |              |      |                                               |                                      |       |               |      |                                   |                                   |   |
|----------------|--------|------------------|------|--------------|------|-----------------------------------------------|--------------------------------------|-------|---------------|------|-----------------------------------|-----------------------------------|---|
| Smith (38)     | Canada | Population-based | 540  | 8.3<br>(2.2) | 70   | Self-reported + above threshold ADHD symptoms | 22.2 % treated with ADHD medications | 9659  | 8.2<br>(2.23) | 49.3 | BMI > 97th centile, self-reported | NA                                | 6 |
| Spencer (9)    | USA    | Clinical         | 95   | 32 (12)      | 43   | Interview, DSM-IV criteria                    | 40 % stimulants                      | 99    | 30 (10)       | 47   | BMI ≥ 30, measured                | NA                                | 6 |
| Tashakori (61) | Iran   | Population-based | 32   | 5-6 years    | 100  | Above threshold ADHD symptoms                 | NS                                   | 32    | 5-6 years     | NS   | BMI > 95th centile, measured      | BMI > 85th centile, measured      | 3 |
| Waring (10)    | USA    | Population-based | 5680 | 5-17 years   | 73.3 | Self-reported                                 | 57.2 % ADHD drugs                    | 57204 | 5-17 years    | 49   | BMI > 95th centile, self-reported | BMI > 85th centile, self-reported | 6 |
| White (62)     | UK     | Population-based | 1766 | age 10       | NS   | Above threshold ADHD symptoms (Connor scale)  | NS                                   | 9623  | age 10        | NS   | BMI > 95th centile, measured      | NA                                | 6 |

**Table S2. Study Characteristics (continued)**

|              |         |                       |     |            |      |                            |                 |      |            |    |                              |                        |   |
|--------------|---------|-----------------------|-----|------------|------|----------------------------|-----------------|------|------------|----|------------------------------|------------------------|---|
| Wilhelm (63) | Germany | Clinical              | 46  | 7-15 years | NS   | Interview, DSM-IV criteria | NS              | 48   | 7-15 years | NS | BMI > 95th centile, measured | NA                     | 4 |
| Yang (64)    | China   | Clinical <sup>c</sup> | 158 | 9.2 (2)    | 77.8 | Interview, DSM-IV criteria | ADHD med.-naïve | 3536 | 6-13 years | NS | WHO criteria, measured       | WHO criteria, measured | 4 |

**Table S3. Studies Excluded From the Meta-Analysis, With Reasons**

<sup>a</sup> Differently from Curtin et al. (2005), Fliers et al. (2013), Poulton et al. (2013), and Yang et al. (2013), outdated normative group was considered not appropriate as comparison group given the increase of obesity prevalence in past decades.

| Reference                                                                                                                                                                                                                                                                                                                    | Reason(s) for exclusion                                                  |
|------------------------------------------------------------------------------------------------------------------------------------------------------------------------------------------------------------------------------------------------------------------------------------------------------------------------------|--------------------------------------------------------------------------|
| Agranat-Meged A, Ghanadri Y, Eisenberg I, Ben Neriah Z, Kieselstein-Gross E, Mitrani-Rosenbaum S. Attention deficit hyperactivity disorder in obese melanocortin-4-receptor (MC4R) deficient subjects: A newly described expression of MC4R deficiency. <i>Am J Med Genet B Neuropsychiatr Genet.</i> 2008;147(8):1547-1553. | Genetic study in a family; no appropriate data for the meta-analysis     |
| Aguirre RL, Katusic SK, Voigt RG, et al. Attention-deficit/hyperactivity disorder treatment and weight outcome: A population-based birth cohort study. <i>Endocr Rev.</i> 2011;32 (3 Meeting abstract)                                                                                                                       | No control group as per protocol                                         |
| Al-Menabbawy K, El-Gerzawy A, Ezzat A, Mottawie H. Developmental, behavioral and genetic factors in correlation with attention deficit hyperactivity disorder in Egyptian children. <i>J Med Sci.</i> 2006;6(4):569-576.                                                                                                     | Contact with authors not successful                                      |
| Albayrak O, Puetter C, Volekmar A-L, et al. Common obesity risk alleles in childhood attention-deficit/hyperactivity disorder. <i>Am J Med Genet B Neuropsychiatr Genet.</i> 2013;162B(4):295-305.                                                                                                                           | Contact with authors to gather data on obesity prevalence not successful |
| Allen AJ, Kurlan RM, Gilbert DL, et al. Atomoxetine treatment in children and adolescents with ADHD and comorbid tic disorders. <i>Neurology.</i> 2005;65(12):1941-1949.                                                                                                                                                     | No control group as per protocol                                         |
| Almog M, Gabis LV, Shefer S, Bujanover Y. Gastrointestinal symptoms in pediatric patients with attention deficit and hyperactivity disorders. <i>Harefuah.</i> 2010;149(1):33-36, 62.                                                                                                                                        | Not possible to contact the authors to request data                      |
| Aman MG, Binder C, Turgay A. Risperidone effects in the presence/absence of psychostimulant medicine in children with ADHD, other disruptive behavior disorders, and subaverage IQ. <i>J Child Adolesc Psychopharmacol.</i> 2004;14(2):243-254.                                                                              | No control group as per protocol                                         |
| Anderson SE, Cohen P, Naumova EN, Must A. Relationship of childhood behavior disorders to                                                                                                                                                                                                                                    | Contact with authors to gather data on obesity prevalence not            |



|                                                                                                                                                                                                                                                                                |                                                                                                                                                                                                                                                   |
|--------------------------------------------------------------------------------------------------------------------------------------------------------------------------------------------------------------------------------------------------------------------------------|---------------------------------------------------------------------------------------------------------------------------------------------------------------------------------------------------------------------------------------------------|
| weight gain from childhood into adulthood. <i>Ambul Pediatr.</i> 2006;6(5):297-301.                                                                                                                                                                                            | successful                                                                                                                                                                                                                                        |
| Antalis CJ, Stevens LJ, Campbell M, Pazdro R, Ericson K, Burgess JR. Omega-3 fatty acid status in attention-deficit/hyperactivity disorder. <i>Prostaglandins Leukot Essent Fatty Acids.</i> 2006;75(4-5):299-308.                                                             | Contact with authors to gather data on obesity prevalence not successful                                                                                                                                                                          |
| Arnold VK, Feifel D, Earl CQ, Yang R, Adler LA. A 9-Week, Randomized, Double-Blind, Placebo-Controlled, Parallel-Group, Dose-Finding Study to Evaluate the Efficacy and Safety of Modafinil as Treatment for Adults With ADHD. <i>J Atten Disord.</i> 2014 2014;18(2):133-144. | No control group as per protocol                                                                                                                                                                                                                  |
| Balia C, Anedda A, Granitzio F, Carucci S, Zuddas A. Long term therapy with methylphenidate induces modest effects on growth in ADHD children. <i>Eur Neuropsychopharmacol.</i> 2013;23:S80.                                                                                   | No control group as per protocol                                                                                                                                                                                                                  |
| Barak A, McCrory MA, Lovejoy JC, Weber W. Eating patterns and risk for overweight in children with Attention Deficit Hyperactive Disorder (ADHD). <i>FASEB J</i> ; 2008;22                                                                                                     | No control group as per protocol                                                                                                                                                                                                                  |
| Barkley RA, McMurray MB, Edelbrock CS, Robbins K. Side-effects of methylphenidate in children with attention-deficit hyperactivity disorder – a systemic, placebo-controlled evaluation. <i>Pediatrics.</i> 1990;86(2):184-192.                                                | No control group as per protocol                                                                                                                                                                                                                  |
| Beezhold B, Johnston CS. Sodium benzoate intake in beverages may contribute to ADHD symptoms in college students. <i>FASEB J.</i> 2012;26.                                                                                                                                     | Same sample as Beezhold BL, Johnston CS, Nochta KA. Sodium Benzoate-Rich Beverage Consumption is Associated With Increased Reporting of ADHD Symptoms in College Students: A Pilot Investigation. <i>J Atten Disord.</i> 2014 2014;18(3):236-241. |
| Bereket A, Turan S, Karaman MG, Haklar G, Ozbay F, Yazgan MY. Height, weight, IGF-I, IGFBP-3 and thyroid functions in prepubertal children with attention deficit hyperactivity disorder: effect of methylphenidate treatment. <i>Horm Res.</i> 2005;63(4):159-164.            | No control group as per protocol                                                                                                                                                                                                                  |
| Bhagat A, Deshmukh V, Shah M, Karira A. Appetite and weight loss in children with attention deficit hyperactivity disorder taking                                                                                                                                              | No control group; no anthropometric measures                                                                                                                                                                                                      |

|                                                                                                                                                                                                                                                                                                     |                                                       |
|-----------------------------------------------------------------------------------------------------------------------------------------------------------------------------------------------------------------------------------------------------------------------------------------------------|-------------------------------------------------------|
| atomoxetine. <i>Indian J Psychiatry</i> . 2011;(1):S69-S70.                                                                                                                                                                                                                                         |                                                       |
| Biederman J, Swanson JM, Wigal SB, Boellner SW, Earl CQ, Lopez FA. A comparison of once-daily and divided doses of modafinil in children with attention-deficit/hyperactivity disorder: a randomized, double-blind, and placebo-controlled study. <i>J Clin Psychiatry</i> . 2006;67(5):727-735     | No control group as per protocol                      |
| Biederman J, Swanson JM, Wigal SB, et al. Efficacy and safety of modafinil film-coated tablets in children and adolescents with attention-deficit/hyperactivity disorder: results of a randomized, double-blind, placebo-controlled, flexible-dose study. <i>Pediatrics</i> . 2005;116(6):e777-784. | No control group as per protocol                      |
| Biederman J, Faraone SV, Monuteaux MC, Plunkett EA, Gifford J, Spencer T. Growth deficits and attention-deficit/hyperactivity disorder revisited: impact of gender, development, and treatment. <i>Pediatrics</i> . 2003;111(5 Pt 1):1010-1016.                                                     | Authors contacted; not able to provide requested data |
| Biederman J, Spencer TJ, Monuteaux MC, Faraone SV. A naturalistic 10-year prospective study of height and weight in children with attention-deficit hyperactivity disorder grown up: sex and treatment effects. <i>J Pediatr</i> . 2010;157(4):635-640, 640 e631.                                   | Authors contacted; not able to provide requested data |
| Bilici M, Yildirim F, Kandil S, et al. Double-blind, placebo-controlled study of zinc sulfate in the treatment of attention deficit hyperactivity disorder. <i>Prog in Neuropsychopharmacol Biol Psychiatry</i> . 2004;28(1):181-190.                                                               | No control group as per protocol                      |
| Boellner SW, Pennick M, Fiske K, Lyne A, Shojaei A. Pharmacokinetics of a guanfacine extended-release formulation in children and adolescents with attention-deficit-hyperactivity disorder. <i>Pharmacotherapy</i> . 2007;27(9):1253-1262.                                                         | No control group as per protocol                      |
| Carucci S, Usala T, Granitzio F, Balia C, Coghil D, Zuddas A. Growth on stimulant medication: Effects in children with ADHD. <i>Eur Neuropsychopharmacol</i> . 2013;23:S605.                                                                                                                        | No control group as per protocol                      |
| Charach A, Figueroa M, Chen S, Ickowicz A, Schachar R. Stimulant treatment over 5 years:                                                                                                                                                                                                            | No control group as per protocol                      |

|                                                                                                                                                                                                                |                                                                                                                                                                                                                                   |
|----------------------------------------------------------------------------------------------------------------------------------------------------------------------------------------------------------------|-----------------------------------------------------------------------------------------------------------------------------------------------------------------------------------------------------------------------------------|
| effects on growth. <i>J Am Acad Child Adolesc Psychiatry</i> . 2006;45(4):415-421.                                                                                                                             |                                                                                                                                                                                                                                   |
| Chen AY, Kim SE, Houtrow AJ, Newacheck PW. Prevalence of obesity among children with chronic conditions. <i>Obesity (Silver Spring)</i> . 2010;18(1):210-213.                                                  | Same cohort as Kim J, Mutyala B, Agiovlasitis S, Fernhall B. Health behaviors and obesity among US children with attention deficit hyperactivity disorder by gender and medication use. <i>Prev Med</i> . 2011;52(3-4):218-222.   |
| Choudhry Z, Sengupta SM, Grizenko N, et al. Association between obesity-related gene FTO and ADHD. <i>Obesity (Silver Spring)</i> . 2013;21(12):E738-E744.                                                     | No control group as per protocol; no anthropometric data                                                                                                                                                                          |
| Choudhry Z, Sengupta SM, Grizenko N, et al. Body Weight and ADHD: Examining the Role of Self-Regulation. <i>PLoS One</i> . 2013;8(1).                                                                          | No control group as per protocol                                                                                                                                                                                                  |
| Choudhry Z, Sengupta SM, Grizenko N, et al. Neurocognitive features of ADHD children stratified according to BMI categories. Figshare. 2013-05-28 2013.                                                        | Data from Choudhry Z, Sengupta SM, Grizenko N, et al. Body Weight and ADHD: Examining the Role of Self-Regulation. <i>PLoS One</i> . 2013;8(1).                                                                                   |
| Choudhry Z, Sengupta SM, Grizenko N, et al. Motivational style and Motor traits of ADHD children stratified according to BMI categories. Figshare. 2013-05-28 2013.                                            | Data from Choudhry Z, Sengupta SM, Grizenko N, et al. Body Weight and ADHD: Examining the Role of Self-Regulation. <i>PLoS One</i> . 2013;8(1).                                                                                   |
| Choudhry Z, Sengupta SM, Grizenko N, et al. Demographic and baseline characteristics of ADHD children stratified according to three BMI categories. Figshare. 2013-05-28 2013.                                 | Data from Choudhry Z, Sengupta SM, Grizenko N, et al. Body Weight and ADHD: Examining the Role of Self-Regulation. <i>PLoS One</i> . 2013;8(1).                                                                                   |
| Cook BG, Li D, Heinrich KM. Obesity, Physical Activity, and Sedentary Behavior of Youth With Learning Disabilities and ADHD. <i>J Learn Disabil</i> . 2014, in press DOI: 10.1177/0950017012474707.            | Same cohort as Lingineni RK, Biswas S, Ahmad N, Jackson BE, Bae S, Singh KP. Factors associated with attention deficit/hyperactivity disorder among US children: results from a national survey. <i>BMC Pediatr</i> . 2012;12:50. |
| Dahlgren J, Wentz E. Overweight and obese children with diagnosed attention deficit hyperactivity disorder have a favourable weight loss with methylphenidate – One year data. <i>Obes Facts</i> . 2012;5:208. | No control group as per protocol                                                                                                                                                                                                  |

|                                                                                                                                                                                                                                                                                                    |                                                                                                |
|----------------------------------------------------------------------------------------------------------------------------------------------------------------------------------------------------------------------------------------------------------------------------------------------------|------------------------------------------------------------------------------------------------|
| Duarte CS, Sourander A, Nikolakaros G, et al. Child Mental Health Problems and Obesity in Early Adulthood. <i>J Pediatr.</i> 2010;156(1):93-97.                                                                                                                                                    | No appropriate measure of ADHD (“hyperactive problems”)                                        |
| Dura-Trave T, Eugenia Yoldi-Petri M, Gallinas-Victoriano F, Zardoya-Santos P. Effects of Osmotic-Release Methylphenidate on Height and Weight in Children With Attention-Deficit Hyperactivity Disorder (ADHD) Following up to Four Years of Treatment. <i>J Child Neurol.</i> 2012;27(5):604-609. | No control group as per protocol                                                               |
| Ebenegger V, Marques-Vidal P-M, Munsch S, et al. Relationship of Hyperactivity/Inattention With Adiposity and Lifestyle Characteristics in Preschool Children. <i>J Child Neurol.</i> 2012;27(7):852-858.                                                                                          | No categorical diagnosis of ADHD or definition of ADHD based on cut-off values as per protocol |
| Egmond-Froehlich AWAv, Weghuber D, Zwaan Md. Association of symptoms of attention-deficit/hyperactivity disorder with physical activity, media time, and food intake in children and adolescents. <i>PloS One.</i> 2012;7(11):e49781.                                                              | No categorical diagnosis of ADHD or definition of ADHD based on cut-off values as per protocol |
| Faraone SV, Biederman J, Monuteaux M, Spencer T. Long-term effects of extended-release mixed amphetamine salts treatment of attention- deficit/hyperactivity disorder on growth. <i>J Child and Adolesc Psychopharmacol.</i> 2005;15(2):191-202.                                                   | No control group as per protocol                                                               |
| Faraone SV, Giefer EE. Long-term effects of methylphenidate transdermal delivery system treatment of ADHD on growth. <i>J Am Acad Child Adolesc Psychiatry.</i> 2007;46(9):1138-1147.                                                                                                              | No control group as per protocol                                                               |
| Faraone SV, Spencer TJ, Kollins SH, Glatt SJ. Effects of lisdexamfetamine dimesylate treatment for ADHD on growth. <i>J Am Acad Child Adolesc Psychiatry.</i> 2010;49(1):24-32.                                                                                                                    | No control group as per protocol                                                               |
| Farietta-Murray T, Castellanos D, Katsikas S. Effects of stimulants on Hispanic boys’ height and weight. <i>J Am Acad Child Adolesc Psychiatry.</i> 2007;46(2):150-151.                                                                                                                            | Contact with authors to gather data on obesity prevalence not successful                       |
| Findling RL, Childress AC, Krishnan S, McGough JJ. Long-term effectiveness and safety of lisdexamfetamine dimesylate in school-aged children with attention-deficit/hyperactivity disorder. <i>CNS Spectr.</i> 2008;13(7):614-620.                                                                 | No control group as per protocol                                                               |

|                                                                                                                                                                                                                                                                                                  |                                                                                                                                                                                                                                                                         |
|--------------------------------------------------------------------------------------------------------------------------------------------------------------------------------------------------------------------------------------------------------------------------------------------------|-------------------------------------------------------------------------------------------------------------------------------------------------------------------------------------------------------------------------------------------------------------------------|
| <p>Findling RL, Ginsberg LD, Jain R, Gao J. Effectiveness, safety, and tolerability of lisdexamfetamine dimesylate in children with attention-deficit/hyperactivity disorder: an open-label, dose-optimization study. <i>J Child and Adolesc Psychopharmacol</i>. 2009;19(6):649-662.</p>        | <p>No control group as per protocol</p>                                                                                                                                                                                                                                 |
| <p>Friedmann N, Thomas J, Carr R, Elders J, Ringdahl I, Roche A. Effect on growth in pemoline-treated children with attention deficit disorder. <i>Am J Dis Child</i>. 1981;135(4):329-332.</p>                                                                                                  | <p>Not possible to gather data on obesity prevalence</p>                                                                                                                                                                                                                |
| <p>Fuemmeler BF, McClernon FJ, Yang C, Pendzich MK, Kollins SH, Ostbye T. Obesity and stage II hypertension in early adulthood are associated with attention deficit/hyperactivity (ADHD) symptoms. <i>Obes Rev</i>. 2010;11:308.</p>                                                            | <p>Same cohort as in Fuemmeler B, Ostbye T, Yang C, McClernon F, Kollins S. Association between attention-deficit/hyperactivity disorder symptoms and obesity and hypertension in early adulthood: A population-based study. <i>Int J Obes</i>. 2011;35(6):852-862.</p> |
| <p>Gabriel A. The mixed amphetamine salt extended release (Adderall XR, Max-XR) as an adjunctive to SSRIS or SNRIS in the treatment of adult ADHD patients with comorbid partially responsive generalized anxiety: an open-label study. <i>Atten Defic Hyperact Disord</i>. 2010;2(2):87-92.</p> | <p>No control group as per protocol</p>                                                                                                                                                                                                                                 |
| <p>Gabriel A, Violato C. Adjunctive atomoxetine to SSRIs or SNRIs in the treatment of adult ADHD patients with comorbid partially responsive generalized anxiety (GA): an open-label study. <i>Atten Defic Hyperact Disord</i>. 2011;3(4):319-326.</p>                                           | <p>No control group as per protocol</p>                                                                                                                                                                                                                                 |
| <p>Giedd JN, Concerta Study G. OROS methylphenidate (MPH) treatment for attention-deficit/hyperactivity disorder: Long-term effect on growth. <i>Ann Neurol</i>. 2003;54:S27-S27.</p>                                                                                                            | <p>No control group as per protocol</p>                                                                                                                                                                                                                                 |
| <p>Golinko BE. Side effects of dexedrine in hyperactive children: operationalization and quantification in a short-term trial. <i>Progr Neuropsychopharmacol Biol Psychiatry</i>. 1982;6(2):175-183.</p>                                                                                         | <p>No control group as per protocol</p>                                                                                                                                                                                                                                 |
| <p>Graziano PA, Bagner DM, Waxmonsky JG, Reid A, McNamara JP, Geffken GR. Co-occurring weight problems among children with attention deficit/hyperactivity disorder: the role</p>                                                                                                                | <p>No control group as per protocol</p>                                                                                                                                                                                                                                 |

|                                                                                                                                                                                                                                                                                  |                                                                                                                                                                                                                                                                       |
|----------------------------------------------------------------------------------------------------------------------------------------------------------------------------------------------------------------------------------------------------------------------------------|-----------------------------------------------------------------------------------------------------------------------------------------------------------------------------------------------------------------------------------------------------------------------|
| of executive functioning. <i>Int J Obes.</i> 2012;36(4):567-572.                                                                                                                                                                                                                 |                                                                                                                                                                                                                                                                       |
| Greenhill LL, Puig-Antich J, Novacenko H, et al. Prolactin, growth hormone and growth responses in boys with attention deficit disorder and hyperactivity treated with methylphenidate. <i>J Am Acad Child Adolesc Psychiatry.</i> 1984;23(1):58-67.                             | No control group as per protocol                                                                                                                                                                                                                                      |
| Gross MD. Growth of hyperkinetic children taking methylphenidate, dextroamphetamine, or imipramine-desipramine. <i>Pediatrics.</i> 1976;58(3):423-431.                                                                                                                           | No control group as per protocol; some subjects diagnosed with minimal brain dysfunction (exclusionary criterion)                                                                                                                                                     |
| Group MTAC. National Institute of Mental Health Multimodal Treatment Study of ADHD follow-up: changes in effectiveness and growth after the end of treatment. <i>Pediatrics.</i> 2004;113(4):762-769.                                                                            | Contact with authors to obtain additional data not successful [this applies to all Mental Health Multimodal Treatment Study-related publications as well as the <i>Preschool ADHD Treatment Study (PATS)</i> study]                                                   |
| Gustafsson P, Kallen K. Perinatal, maternal, and fetal characteristics of children diagnosed with attention-deficit-hyperactivity disorder: results from a population-based study utilizing the Swedish Medical Birth Register. <i>Dev Med Child Neurol.</i> 2011;53(3):263-268. | No anthropometric data as per protocol                                                                                                                                                                                                                                |
| Halfon N, Larson K, Slusser W. Associations between obesity and comorbid mental health, developmental, and physical health conditions in a nationally representative sample of US children aged 10 to 17. <i>Acad Pediatr.</i> 2013;13(1):6-13.                                  | Same cohort as Lingineni RK, Biswas S, Ahmad N, Jackson BE, Bae S, Singh KP. Factors associated with attention deficit/hyperactivity disorder among US children: results from a national survey. <i>BMC Pediatr.</i> 2012;12:50.                                      |
| Halmoy A, Klungsoyr K, Skjaerven R, Haavik J. Pre- and perinatal risk factors in adults with attention-deficit/hyperactivity disorder. <i>Biol Psychiatry.</i> 2012;71(5):474-481.                                                                                               | No anthropometric data as per protocol                                                                                                                                                                                                                                |
| Hanc T, Cieslik J. Growth in stimulant-I children with attention-deficit/hyperactivity disorder using cross-sectional and longitudinal approaches. <i>Pediatrics.</i> 2008;121(4):e967-974.                                                                                      | Contacted via e-mail, first author stated that part of the subjects included in this study were also included in Hanc T, Slopian A, Wolanczyk T, et al. ADHD and overweight in boys: cross-sectional study with birth weight as a controlled factor. <i>Eur Child</i> |

|                                                                                                                                                                                                                            |                                                                                                                                                                                                                                                                                                                                  |
|----------------------------------------------------------------------------------------------------------------------------------------------------------------------------------------------------------------------------|----------------------------------------------------------------------------------------------------------------------------------------------------------------------------------------------------------------------------------------------------------------------------------------------------------------------------------|
|                                                                                                                                                                                                                            | Adolesc Psychiatry. 2014. DOI 10.1007/s00787-014-0531-1.                                                                                                                                                                                                                                                                         |
| Hanc T, Cieslik J, Wolanczyk T, Gajdzik M. Assessment of growth in pharmacological treatment-I Polish boys with attention-deficit/hyperactivity disorder. <i>J Child and Adolesc Psychopharmacol</i> . 2012;22(4):300-306. | Contacted via e-mail, first author stated that part of the subjects included in this study were also included in Hanc T, Sloprien A, Wolanczyk T, et al. ADHD and overweight in boys: cross-sectional study with birth weight as a controlled factor. <i>Eur Child Adolesc Psychiatry</i> . 2014. DOI 10.1007/s00787-014-0531-1. |
| Hanc T, Cieslik J. Developmental changes in body mass and frequency of overweight and obesity in boys with Attention Deficit Hyperactivity Disorder. <i>Polish J Environ Studies</i> . 2008; 4A: 162-167.                  | Contacted via e-mail, first author stated that part of the subjects included in this study were also included in Hanc T, Sloprien A, Wolanczyk T, et al. ADHD and overweight in boys: cross-sectional study with birth weight as a controlled factor. <i>Eur Child Adolesc Psychiatry</i> . 2014. DOI 10.1007/s00787-014-0531-1. |
| Hartmann AS, Rief W, Hilbert A. Impulsivity and negative mood in adolescents with loss of control eating and ADHD symptoms: an experimental study. <i>Eat Weight Disord</i> . 2013;18(1):53-60.                            | Refers to same sample as Hartmann AS, Rief W, Hilbert A. Laboratory snack food intake, negative mood, and impulsivity in youth with ADHD symptoms and episodes of loss of control eating. Where is the missing link? <i>Appetite</i> . 2012;58(2):672-678.                                                                       |
| Heinonen K, Raikkonen K, Pesonen A-K, et al. Trajectories of growth and symptoms of attention-deficit/hyperactivity disorder in children: a longitudinal study. <i>BMC Pediatr</i> . 2011;11:84.                           | No categorical diagnosis of ADHD or definition of ADHD based on cut-off values as per protocol                                                                                                                                                                                                                                   |
| Hellgren L, Gillberg C, Gillberg IC, Enerskog I. Children with deficits in attention, motor control and perception (DAMP) almost grown up: general health at 16 years. <i>Dev Med Child Neurol</i> . 1993;35(10):881-892.  | DAMP (deficit in attention, motor control and perception) (exclusion criterion as per protocol); data requested for subsample with ADHD but contact with authors not successful                                                                                                                                                  |
| Hinney A, Albayrak, Putter C, et al. Obesity risk allele is associated with childhood attention-deficit/hyperactivity disorder: A cross disorder analysis. <i>Obes Facts</i> . 2012;5:175-176.                             | Same sample as Albayrak O, Puetter C, Volckmar A-L, et al. Common obesity risk alleles in childhood attention-deficit/hyperactivity disorder. <i>Am</i>                                                                                                                                                                          |

|                                                                                                                                                                                                                                |                                                                                                                                                                                                                                                    |
|--------------------------------------------------------------------------------------------------------------------------------------------------------------------------------------------------------------------------------|----------------------------------------------------------------------------------------------------------------------------------------------------------------------------------------------------------------------------------------------------|
|                                                                                                                                                                                                                                | J Med Gen Part B-Neuropsychiatri Genet. 2013;162B(4):295-305.                                                                                                                                                                                      |
| Holtkamp K, Konrad K, Muller B, et al. Overweight and obesity in children with Attention-Deficit/Hyperactivity Disorder. Int J Obes. 2004;28(5):685-689.                                                                       | No control group as per protocol <sup>a</sup>                                                                                                                                                                                                      |
| Hubel R, Jass J, Marcus A, Laessle RG. The relationship between nutritional intake and ADHD symptoms in boys: Preliminary results of a control study. Zeitschrift Fur Gesundheitspsychologie. 2008;16(4):196-200.              | No categorical diagnosis of ADHD or definition of ADHD based on cut-off values as per protocol                                                                                                                                                     |
| Iseri E, Kilic BG, Senol S, Karabacak NI. Effects of methylphenidate on leptin and appetite in children with attention-deficit hyperactivity disorder: an open label trial. Methods Find Exp Clin Pharmacol. 2007;29(1):47-52. | Contact with authors to gather data on obesity prevalence not successful                                                                                                                                                                           |
| Ivan I, Azarbad L, Corsica J, Hood M. Does Binge Eating Mediate the Relationship Between ADHD Characteristics and Obesity Severity? Obesity. 2009;17:S286-S287.                                                                | No inclusion criteria for subjects (candidates to bariatric surgery)                                                                                                                                                                               |
| Janicke DM, Harman JS, Kelleher KJ, Zhang J. The association of psychiatric diagnoses, health service use, and expenditures in children with obesity-related health conditions. J Pediatr Psychol. 2009;34(1):79-88.           | No inclusion criteria for subjects (children with obesity-related conditions, i.e., metabolic diseases); No anthropometric data as per protocol                                                                                                    |
| Kalachnik JE, Sprague RL, Sleator EK, Cohen MN, Ullmann RK. Effect of methylphenidate hydrochloride on stature of hyperactive children. Dev Med Child Neurol. 1982;24(5):586-595.                                              | Authors contacted; not able to provide requested data                                                                                                                                                                                              |
| Kamal M, Bener A, Ehlayel MS. Is high prevalence of vitamin D deficiency a correlate for attention deficit hyperactivity disorder? Atten Defic Hyperact Disord 2014;6(2):73-78.                                                | Same sample as in Bener A, Kamal M. Predict attention deficit hyperactivity disorder? Evidence – based medicine. Glob J Health Sci. 2014;6(2):47-57.                                                                                               |
| Khalife N, Kantomaa M, Glover V, et al. Obesity and physical inactivity are associated with ADHD symptoms in adolescents. Eur J Epidemiol. 2013;(1):S126-S127.                                                                 | Same sample as in Khalife N, Kantomaa M, Glover V, et al. Childhood attention-deficit/hyperactivity disorder symptoms are risk factors for obesity and physical inactivity in adolescence. J Am Acad Child Adolesc Psychiatry. 2014;53(4):425-436. |



|                                                                                                                                                                                                                                         |                                                                                                                                                                                                                                                                                                                            |
|-----------------------------------------------------------------------------------------------------------------------------------------------------------------------------------------------------------------------------------------|----------------------------------------------------------------------------------------------------------------------------------------------------------------------------------------------------------------------------------------------------------------------------------------------------------------------------|
| <p>Kim MK, Lee HA, Kim EJ, et al. The association between overweight and attention deficit/ hyperactivity disorder (ADHD) in childhood. <i>Am J Epidemiol.</i> 2011;173:S126.</p>                                                       | <p>Contact with authors to gather data on obesity prevalence and study details not successful</p>                                                                                                                                                                                                                          |
| <p>Kim J, Fernhall B. Overweight among Children with Attention Deficit Hyperactivity Disorder. <i>Disabil Health J.</i> 2009;2(1):E7-E8.</p>                                                                                            | <p>Same cohort as in Kim J, Mutyala B, Agiovlasitis S, Fernhall B. Health behaviors and obesity among US children with attention deficit hyperactivity disorder by gender and medication use. <i>Prev Med.</i> 2011;52(3-4):218-222.</p>                                                                                   |
| <p>Klein RG, Landa B, Mattes JA, Klein DF. Methylphenidate and growth in hyperactive children. A controlled withdrawal study. <i>Arch Gen Psychiatry.</i> 1988;45(12):1127-1130.</p>                                                    | <p>Data on weight and height not available at baseline. Data on weight and height at 33-y FU analyzed in Cortese S, Olazagasti MAR, Klein RG, Castellanos FX, Proal E, Mannuzza S. Obesity in Men With Childhood ADHD: A 33-Year Controlled, Prospective, Follow-up Study. <i>Pediatrics.</i> 2013;131(6):E1731-E1738.</p> |
| <p>Klein RG, Mannuzza S. Hyperactive boys almost grown up. III. Methylphenidate effects on ultimate height. <i>Arch Gen Psychiatry.</i> 1988;45(12):1131-1134.</p>                                                                      | <p>Data on weight and height not available at baseline. Data on weight and height at 33-y FU analyzed in Cortese S, Olazagasti MAR, Klein RG, Castellanos FX, Proal E, Mannuzza S. Obesity in Men With Childhood ADHD: A 33-Year Controlled, Prospective, Follow-up Study. <i>Pediatrics.</i> 2013;131(6):E1731-E1738.</p> |
| <p>Korczak DJ, Lipman E, Morrison K, Duku E, Szatmari P. Child and adolescent psychopathology predicts increased adult body mass index: results from a prospective community sample. <i>J Dev Behav Pediatr</i> 2014;35(2):108-117.</p> | <p>Contact with authors to gather additional data not successful</p>                                                                                                                                                                                                                                                       |
| <p>Koshy G, Delpishesh A, Brabin B. Obesity and parental smoking as risk factors for childhood adhd in Liverpool children. <i>J Epidemiol Community Health</i> 2011;65(Suppl 1): A236.</p>                                              | <p>Same sample as in Koshy G, Delpisheh A, Brabin B. Childhood obesity and parental smoking as risk factors for childhood adhd in Liverpool children. <i>Atten Defic Hyperact Disord.</i> 2011;3(1): 21-28</p>                                                                                                             |
| <p>Kuzelova H, Ptacek R, Papezova H. Signs of nutrition in ADHD children. <i>Eur Psychiatry.</i> 2011 (Suppl 1);26.</p>                                                                                                                 | <p>Contact with authors to gather data on obesity prevalence and clarify possible overlap of subjects across</p>                                                                                                                                                                                                           |

|                                                                                                                                                                                                                                                                |                                                                                                                                                             |
|----------------------------------------------------------------------------------------------------------------------------------------------------------------------------------------------------------------------------------------------------------------|-------------------------------------------------------------------------------------------------------------------------------------------------------------|
|                                                                                                                                                                                                                                                                | studies by the same first author not successful                                                                                                             |
| Lam LT, Yang L. Overweight/obesity and attention deficit and hyperactivity disorder tendency among adolescents in China. <i>Int J Obes.</i> 2007;31(4):584-590.                                                                                                | Authors contacted; they replied that no cut-off point was used in relation to ADHD symptoms. Therefore, no inclusion criterion for subjects as per protocol |
| Landrigan PJ. The national children's study and its relationship to prospective international studies in child health. <i>Birth Defects Research Part A - Clinical and Molecular Teratology.</i> 2012;94 (5):379.                                              | Research protocol/review                                                                                                                                    |
| Landrigan PJ. The national children's study and its relationship to prospective international studies in child health. <i>Birth Defects Research Part A - Clinical and Molecular Teratology.</i> 2012;94 (5):379.                                              | Research protocol/review (same as the previous one)                                                                                                         |
| Langley K, Fowler T, Ford T, et al. Adolescent clinical outcomes for young people with attention-deficit hyperactivity disorder. <i>Br J Psychiatry</i> 2010;196(3):235-240.                                                                                   | No anthropometric data as per protocol                                                                                                                      |
| Lecendreux M, Zuddas A, Banaschewski T, et al. Weight-related safety outcomes of lisdexamfetamine dimesylate in children and adolescents with attention-deficit/hyperactivity disorder. <i>Eur Child Adolesc Psychiatry.</i> 2013;(1):S223.                    | No control group as per protocol                                                                                                                            |
| Levitan RD, Masellis M, Lam RW, et al. Childhood inattention and dysphoria and adult obesity associated with the dopamine D4 receptor gene in overeating women with seasonal affective disorder. <i>Neuropsychopharmacology.</i> 2004;29(1):179-186.           | No inclusion criteria for subjects as per protocol (women with seasonal affective disorder, SAD)                                                            |
| Levy LD, Fleming JP, Klar D. Treatment of refractory obesity in severely obese adults following management of newly diagnosed attention deficit hyperactivity disorder. <i>Int J Obes.</i> 2009;33(3):326-334.                                                 | No inclusion criteria for subjects as per protocol (subjects with obesity)                                                                                  |
| Lubell EC. An examination of the diagnosis of adult attention deficit hyperactivity disorder and incidence of impulsivity, obesity and alcohol abuse. <i>Dissertation Abstracts International: Section B: The Sciences and Engineering.</i> 1999;60(3-B):1020. | Not possible to contact the authors to request data                                                                                                         |

|                                                                                                                                                                                                                                                                              |                                                                                                                                                            |
|------------------------------------------------------------------------------------------------------------------------------------------------------------------------------------------------------------------------------------------------------------------------------|------------------------------------------------------------------------------------------------------------------------------------------------------------|
| McGee R, Birkbeck J, Silva PA. Physical development of hyperactive boys. <i>Dev Med Child Neurol.</i> 1985;27(3):364-368.                                                                                                                                                    | Contact with authors to gather data on obesity prevalence not successful                                                                                   |
| McGough JJ, McBurnett K, Bukstein O, et al. Once-daily OROS methylphenidate is safe and well tolerated in adolescents with attention-deficit/hyperactivity disorder. <i>J Child and Adolesc Psychopharmacol.</i> 2006;16(3):351-356.                                         | No control group as per protocol                                                                                                                           |
| McWilliams L, Sayal K, Glazebrook C. Inattention and hyperactivity in children at risk of obesity: A community cross-sectional study. <i>BMJ Open.</i> 2013;3(5).                                                                                                            | No inclusion criteria as per protocol (subjects included here if rated as overweight, with low exercise self-efficacy, or asthma)                          |
| McWilliams LA, Sayal K, Mullan NK, Nathan D, Glazebrook C. Symptoms of inattention and hyperactivity in children with risk factors for obesity. <i>Pediatr Res.</i> 2011;70:385-385.                                                                                         | No inclusion criteria as per protocol (subjects included here if rated as overweight, with low exercise self-efficacy, self-reported inactivity or asthma) |
| Millichap JG. Growth of hyperactive children treated with methylphenidate. <i>J Learn Disabil.</i> 1978;11(9):567-570.                                                                                                                                                       | No control group as per protocol; reference group not specified                                                                                            |
| Moungnoi P, Maipang P. Long-term effects of short-acting methylphenidate on growth rates of children with attention deficit hyperactivity disorder at Queen Sirikit National Institute of Child Health. <i>J Med Assoc Thai.</i> 2011;94 Suppl 3:S158-163.                   | No control group as per protocol                                                                                                                           |
| Mueller F, Brielmaier S, Domsch H, Luyckx V, Ehlers T, Krowatschek D. Increased resting energy expenditure in children with attention-deficit-hyperactivity disorder. <i>Eat Weight Disord.</i> 2010;15(3):e144-e151.                                                        | Authors contacted; not able to provide data on obesity prevalence                                                                                          |
| Mustillo S, Worthman C, Erkanli A, Keeler G, Angold A, Costello EJ. Obesity and psychiatric disorder: developmental trajectories. <i>Pediatrics.</i> 2003;111(4 Pt 1):851-859                                                                                                | Contact with authors to gather data on obesity prevalence in ADHD at baseline not successful                                                               |
| Newcorn JH, Stein MA, Cooper KM. Dose-response characteristics in adolescents with attention-deficit/hyperactivity disorder treated with OROS methylphenidate in a 4-week, open-label, dose-titration study. <i>J Child and Adolesc Psychopharmacol.</i> 2010;20(3):187-196. | No control group as per protocol                                                                                                                           |
| Nurmi EL. Genetic influences on growth effects of dexamethylphenidate and guanfacine in pediatric ADHD. <i>Biol Psychiatry.</i>                                                                                                                                              | No control group as per protocol                                                                                                                           |

|                                                                                                                                                                                                                                                                                                                                                            |                                                                                                                                                                                                                                                                                         |
|------------------------------------------------------------------------------------------------------------------------------------------------------------------------------------------------------------------------------------------------------------------------------------------------------------------------------------------------------------|-----------------------------------------------------------------------------------------------------------------------------------------------------------------------------------------------------------------------------------------------------------------------------------------|
| 2014;(1):347S-348S.                                                                                                                                                                                                                                                                                                                                        |                                                                                                                                                                                                                                                                                         |
| Patte KA, Davis C, Levitan RD, et al. A Genetic Study of the Attention-Deficit/Hyperactivity Disorder-Obesity CoMorbidity: The Role of the Dopamine D2 Receptor (DRD2) Gene. <i>Obesity</i> . 2009;17:S225-S226.                                                                                                                                           | No inclusion criteria for subjects as per protocol (adults with binge eating disorder (BED), non BED, controls)                                                                                                                                                                         |
| Petrone P, Prunas A, Dazzi S, Madeddu F. ADHD symptoms as risk factors for dysfunctional eating habits in adolescents: Results from a longitudinal study. [Italian] La sintomatologia ADHD come fattore di rischio per lo sviluppo di condotte alimentari patologiche in adolescenza: Uno studio longitudinale. <i>Riv Psichiatr</i> . 2013;48(6):448-455. | Contact with authors to gather obesity prevalence not successful                                                                                                                                                                                                                        |
| Porfirio MC, Giana G, Benvenuto A, Giovinazzo S, Belvedere RC, Curatolo P. ADHD, obesity: An Italian clinical sample. <i>Eur Child Adolesc Psychiatry</i> . 2010;19:S28.                                                                                                                                                                                   | Authors contacted; not able to provide requested data on obesity prevalence                                                                                                                                                                                                             |
| Poulton A, Briody J, Melzer E, Baur L. Immediate and long term changes in body composition on stimulant medication. <i>J Paediatr Child Health</i> . 2011;47:10-11                                                                                                                                                                                         | 1. Same sample as in Poulton A, Briody J, McCorquodale T, Melzer E, Herrmann M, Baur LA, Duque G. Weight loss on stimulant medication: how does it affect body composition and bone metabolism? - A prospective longitudinal study. <i>Int J Pediatr Endocrinol</i> . 2012; 2012(1):30. |
| Poulton A, Cowell CT. Slowing of growth in height and weight on stimulants: a characteristic pattern. <i>J Paediatr Child Health</i> . 2003;39(3):180-185.                                                                                                                                                                                                 | No control group as per protocol                                                                                                                                                                                                                                                        |
| Ptacek R, Kuzelova H, Stefano GB, et al. Disruptive patterns of eating behaviors and associated lifestyles in males with ADHD. <i>Med Sci Monit</i> . 2014;20:608-613.                                                                                                                                                                                     | No anthropometric data as per protocol                                                                                                                                                                                                                                                  |
| Ptacek R, Kuzelova H, Paclt I, Zukov I. Effect of medication on anthropometric characteristic of ADHD children. <i>Ceska Slov Psychiatr</i> . 2008;104(8):415-419.                                                                                                                                                                                         | Contact with authors to gather data on obesity prevalence and clarify possible overlap of subjects across studies by the same first author not successful                                                                                                                               |
| Ptacek R, Kuzelova H, Paclt I, Zukov I, Fischer S. ADHD and growth: anthropometric changes                                                                                                                                                                                                                                                                 | Contact with authors to gather data on obesity prevalence and clarify                                                                                                                                                                                                                   |

|                                                                                                                                                                                                                                           |                                                                                                                                                           |
|-------------------------------------------------------------------------------------------------------------------------------------------------------------------------------------------------------------------------------------------|-----------------------------------------------------------------------------------------------------------------------------------------------------------|
| in medicated and non-medicated ADHD boys. Med Sci Monit. 2009;15(12):CR595-599.                                                                                                                                                           | possible overlap of subjects across studies by the same first author not successful                                                                       |
| Ptacek R, Kuzelova H, Paclt I, Zukov I, Fischer S. Somatic and endocrinological changes in non medicated ADHD children. Prague Med Rep. 2009;110(1):25-34.                                                                                | Review of the literature with no original data                                                                                                            |
| Ptacek R, Kuzelova H, Paclt I, Zukov I, Fischer S. Developmental changes in children with ADHD and effecto of medication on growth. [Czech]. Vyojove zmeny u deti s ADHD a vliv medikace na rust. Psychiatrie. 2009;13(SUPPL. 2):104-105. | Contact with authors to gather data on obesity prevalence and clarify possible overlap of subjects across studies by the same first author not successful |
| Ptacek R, Kuzelva H, Paclt I, Zukov I, Fischer S. Anthropometric changes in non-medicated ADHD boys. Neuro Endocrinol Lett. 2009;30(3):377-381.                                                                                           | Contact with authors to gather data on obesity prevalence and clarify possible overlap of subjects across studies by the same first author not successful |
| Rappoport MD, Denney C. Titrating methylphenidate in children with attention-deficit/hyperactivity disorder: is body mass predictive of clinical response? J Am Acad Child Adolesc Psychiatry. 1997;36(4):523-530.                        | No control group as per protocol                                                                                                                          |
| Rappoport MD, DuPaul GJ, Kelly KL. Attention deficit hyperactivity disorder and methylphenidate: the relationship between gross body weight and drug response in children. Psychopharmacol Bull. 1989;25(2):285-290.                      | No control group as per protocol                                                                                                                          |
| Ratcliff KL. Using Adiposity Change in College Freshman to Examine the Comorbidity of ADHD and Obesity. Dissertation Abstracts International: Section B: The Sciences and Engineering. 2010;71(6-B):3945.                                 | Contact with authors to gather additional information on study measures not successful                                                                    |
| Roizen NJ, Blondis TA, Pfiesser LJ. Obese children with ADHD exhibit inferior ball skills compared to ADHD children without obesity. Pediatr Res. 2002;51(4):29A-29A.                                                                     | No control group as per protocol                                                                                                                          |
| Schertz M, Adesman AR, Alfieri NE, Bienkowski RS. Predictors of weight loss in children with attention deficit hyperactivity disorder treated with stimulant medication. Pediatrics. 1996;98(4 Pt 1):763-769.                             | No control group as per protocol                                                                                                                          |
| Schwartz BS, Bailey-Davis L, Bandeen-Roche K, et al. Attention deficit disorder, stimulant use, and childhood body mass index trajectory. Pediatrics. 2014;133(4):668-676.                                                                | Authors contacted; not able to provide requested data on obesity prevalence                                                                               |

|                                                                                                                                                                                                                                                                                                 |                                                                                                       |
|-------------------------------------------------------------------------------------------------------------------------------------------------------------------------------------------------------------------------------------------------------------------------------------------------|-------------------------------------------------------------------------------------------------------|
| <p>Spencer TJ, Faraone SV, Biederman J, et al. Does prolonged therapy with a long-acting stimulant suppress growth in children with ADHD? <i>J Am Acad Child Adolesc Psychiatry</i>. 2006;45(5):527-537.</p>                                                                                    | <p>No control group as per protocol</p>                                                               |
| <p>Spencer TJ, Kratochvil CJ, Sangal R, et al. Effects of atomoxetine on growth in children with attention-deficit/hyperactivity disorder following up to five years of treatment. <i>J Child and Adolesc Psychopharmacol</i>. 2007;17(5):689-699.</p>                                          | <p>No control group as per protocol</p>                                                               |
| <p>Spencer TJ, Newcorn JH, Kratochvil CJ, Ruff D, Michelson D, Biederman J. Effects of atomoxetine on growth after 2-year treatment among pediatric patients with attention-deficit/hyperactivity disorder. <i>Pediatrics</i>. 2005;116(1):e74-80.</p>                                          | <p>No control group as per protocol</p>                                                               |
| <p>Spencer TJ, Biederman J, Harding M, O'Donnell D, Faraone SV, Wilens TE. Growth deficits in ADHD children revisited: evidence for disorder-associated growth delays? <i>J Am Acad Child Adolesc Psychiatry</i>. 1996;35(11):1460-1469.</p>                                                    | <p>Authors contacted; not able to provide requested data on obesity prevalence</p>                    |
| <p>St Sauver JL, Barbaresi WJ, Katusic SK, Colligan RC, Weaver AL, Jacobsen SJ. Early life risk factors for attention-deficit/hyperactivity disorder: a population-based cohort study. <i>Mayo Clin Proc</i>. 2004;79(9):1124-1131.</p>                                                         | <p>No anthropometric data as per protocol</p>                                                         |
| <p>Stocks JD, Taneja BK, Baroldi P, Findling RL. A phase 2a randomized, parallel group, dose-ranging study of molindone in children with attention-deficit/hyperactivity disorder and persistent, serious conduct problems. <i>J Child and Adolesc Psychopharmacol</i>. 2012;22(2):102-111.</p> | <p>No control group as per protocol</p>                                                               |
| <p>Strimas R, Davis C, Patte K, Curtis C, Reid C, McCool C. Symptoms of attention-deficit/hyperactivity disorder, overeating, and body mass index in men. <i>Eat Behav</i>. 2008;9(4):516-518.</p>                                                                                              | <p>No categorical diagnosis of ADHD or definition of ADHD based on cut-off values as per protocol</p> |
| <p>Upadhyaya HP, Camporeale A, Ramos-Quiroga JA, et al. Safety and tolerability of atomoxetine hydrochloride in a placebo-controlled randomized withdrawal study in adults with attention-deficit/hyperactivity disorder.</p>                                                                   | <p>No control group as per protocol</p>                                                               |

|                                                                                                                                                                                                                              |                                                                                                                                                                                                                                       |
|------------------------------------------------------------------------------------------------------------------------------------------------------------------------------------------------------------------------------|---------------------------------------------------------------------------------------------------------------------------------------------------------------------------------------------------------------------------------------|
| Neuropsychopharmacology. 2012;38:S318.                                                                                                                                                                                       |                                                                                                                                                                                                                                       |
| van Egmond-Froehlich AWA, Weghuber D, de Zwaan M. Association of Symptoms of Attention-Deficit/Hyperactivity Disorder with Physical Activity, Media Time, and Food Intake in Children and Adolescents. PloS One. 2012;7(11). | No categorical diagnosis of ADHD or definition of ADHD based on cut-off values as per protocol                                                                                                                                        |
| van Egmond-Frohlich A, Widhalm K, de Zwaan M. Association of symptoms of attention-deficit/hyperactivity disorder with childhood overweight adjusted for confounding parental variables. Int J Obes. 2012;36(7):963-968.     | No categorical diagnosis of ADHD or definition of ADHD based on cut-off values as per protocol                                                                                                                                        |
| Verret C, Gardiner P, Beliveau L. Fitness level and gross motor performance of children with attention-deficit hyperactivity disorder. Adapt Phys Activ Q. 2010;27(4):337-351.                                               | Contact with authors to gather additional data not successful                                                                                                                                                                         |
| Verret C, Guay M-C, Berthiaume C, Gardiner P, Beliveau L. A Physical Activity Program Improves Behavior and Cognitive Functions in Children With ADHD: An Exploratory Study. J Atten Disord. 2012;16(1):71-80.               | No control group as per protocol                                                                                                                                                                                                      |
| von Stumm S, Deary IJ, Kivimaki M, Jokela M, Clark H, Batty GD. Childhood behavior problems and health at midlife: 35-year follow-up of a Scottish birth cohort. J Child Psychol Psychiatry. 2011;52(9):992-1001.            | No categorical diagnosis of ADHD or definition of ADHD based on cut-off values as per protocol ("hyperactivity")                                                                                                                      |
| Wilhelm C, Marx I, Konrad K, Willmes K, Holtkamp K, Vloet T, Herpertz-Dahlmann B. Differential patterns of disordered eating in subjects with ADHD and overweight. World J Biol Psychiatry. 2011;12 Suppl 1:118-23.          | Contact with authors to gather additional information not successful                                                                                                                                                                  |
| Wilhelm C, Marx I, Konrad K, et al. Differential patterns of disordered eating in subjects with ADHD and overweight. World J Biol Psychiatry. 2011;12 Suppl 1:118-123.                                                       | Same sample as in Wilhelm C, Marx I, Konrad K, Willmes K, Holtkamp K, Vloet T, Herpertz-Dahlmann B. Differential patterns of disordered eating in subjects with ADHD and overweight. World J Biol Psychiatry. 2011;12 Suppl 1:118-23. |
| Yook KH, Kim YW, Suh HS. Obesity is associated with non-response to prolonged-release methylphenidate treatment in ADHD. Eur Neuropsychopharmacol. 2012;22:S415-                                                             | No control group as per protocol                                                                                                                                                                                                      |

|                                                                                                                                                                                    |                                  |
|------------------------------------------------------------------------------------------------------------------------------------------------------------------------------------|----------------------------------|
| S416.                                                                                                                                                                              |                                  |
| Zachor DA, Roberts AW, Bart Hodgens J, Isaacs JS, Merrick J. Effects of long-term psychostimulant medication on growth of children with ADHD. Res Dev Disabil. 2006;27(2):162-174. | No control group as per protocol |



FIGURE S1. Forest Plot Showing the Results of the Subgroup Meta-Analysis of Studies in Children/Adolescents\*

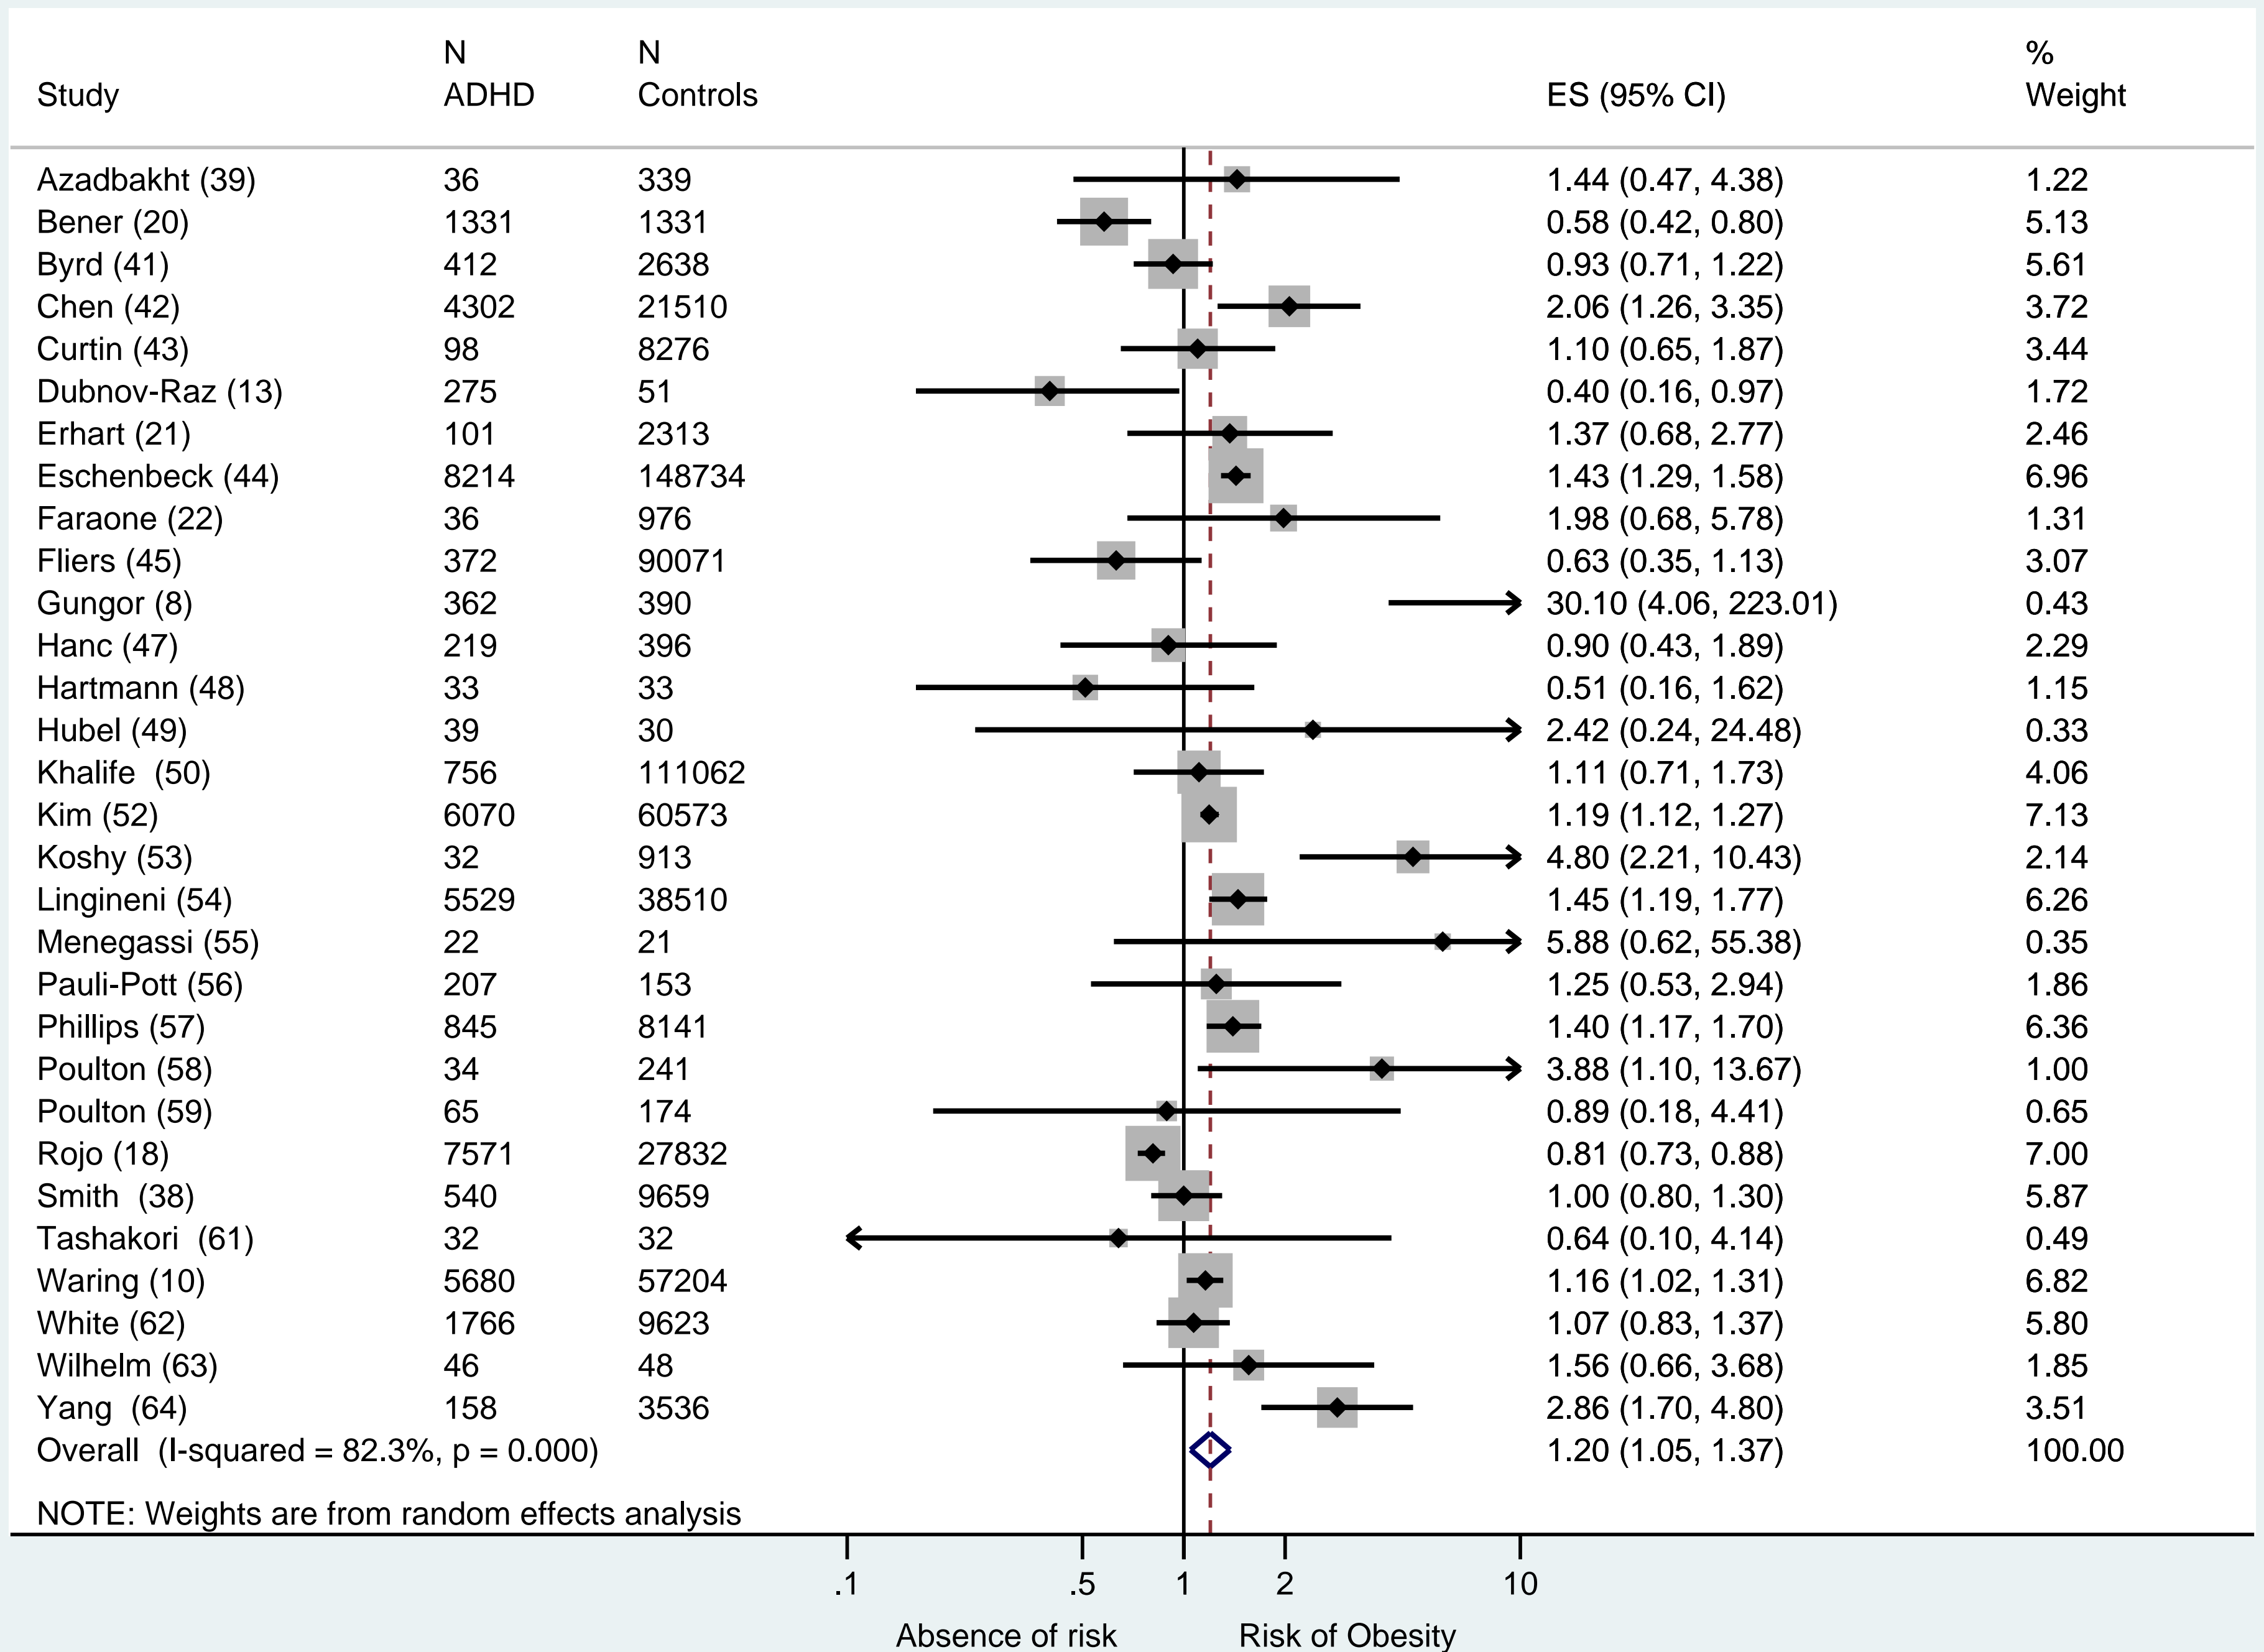

\*The area of each square is proportional to the weight that the individual study contributed to the meta-analysis.

FIGURE S2. Forest Plot Showing the Results of the Subgroup Meta-Analysis of Studies in Adults\*

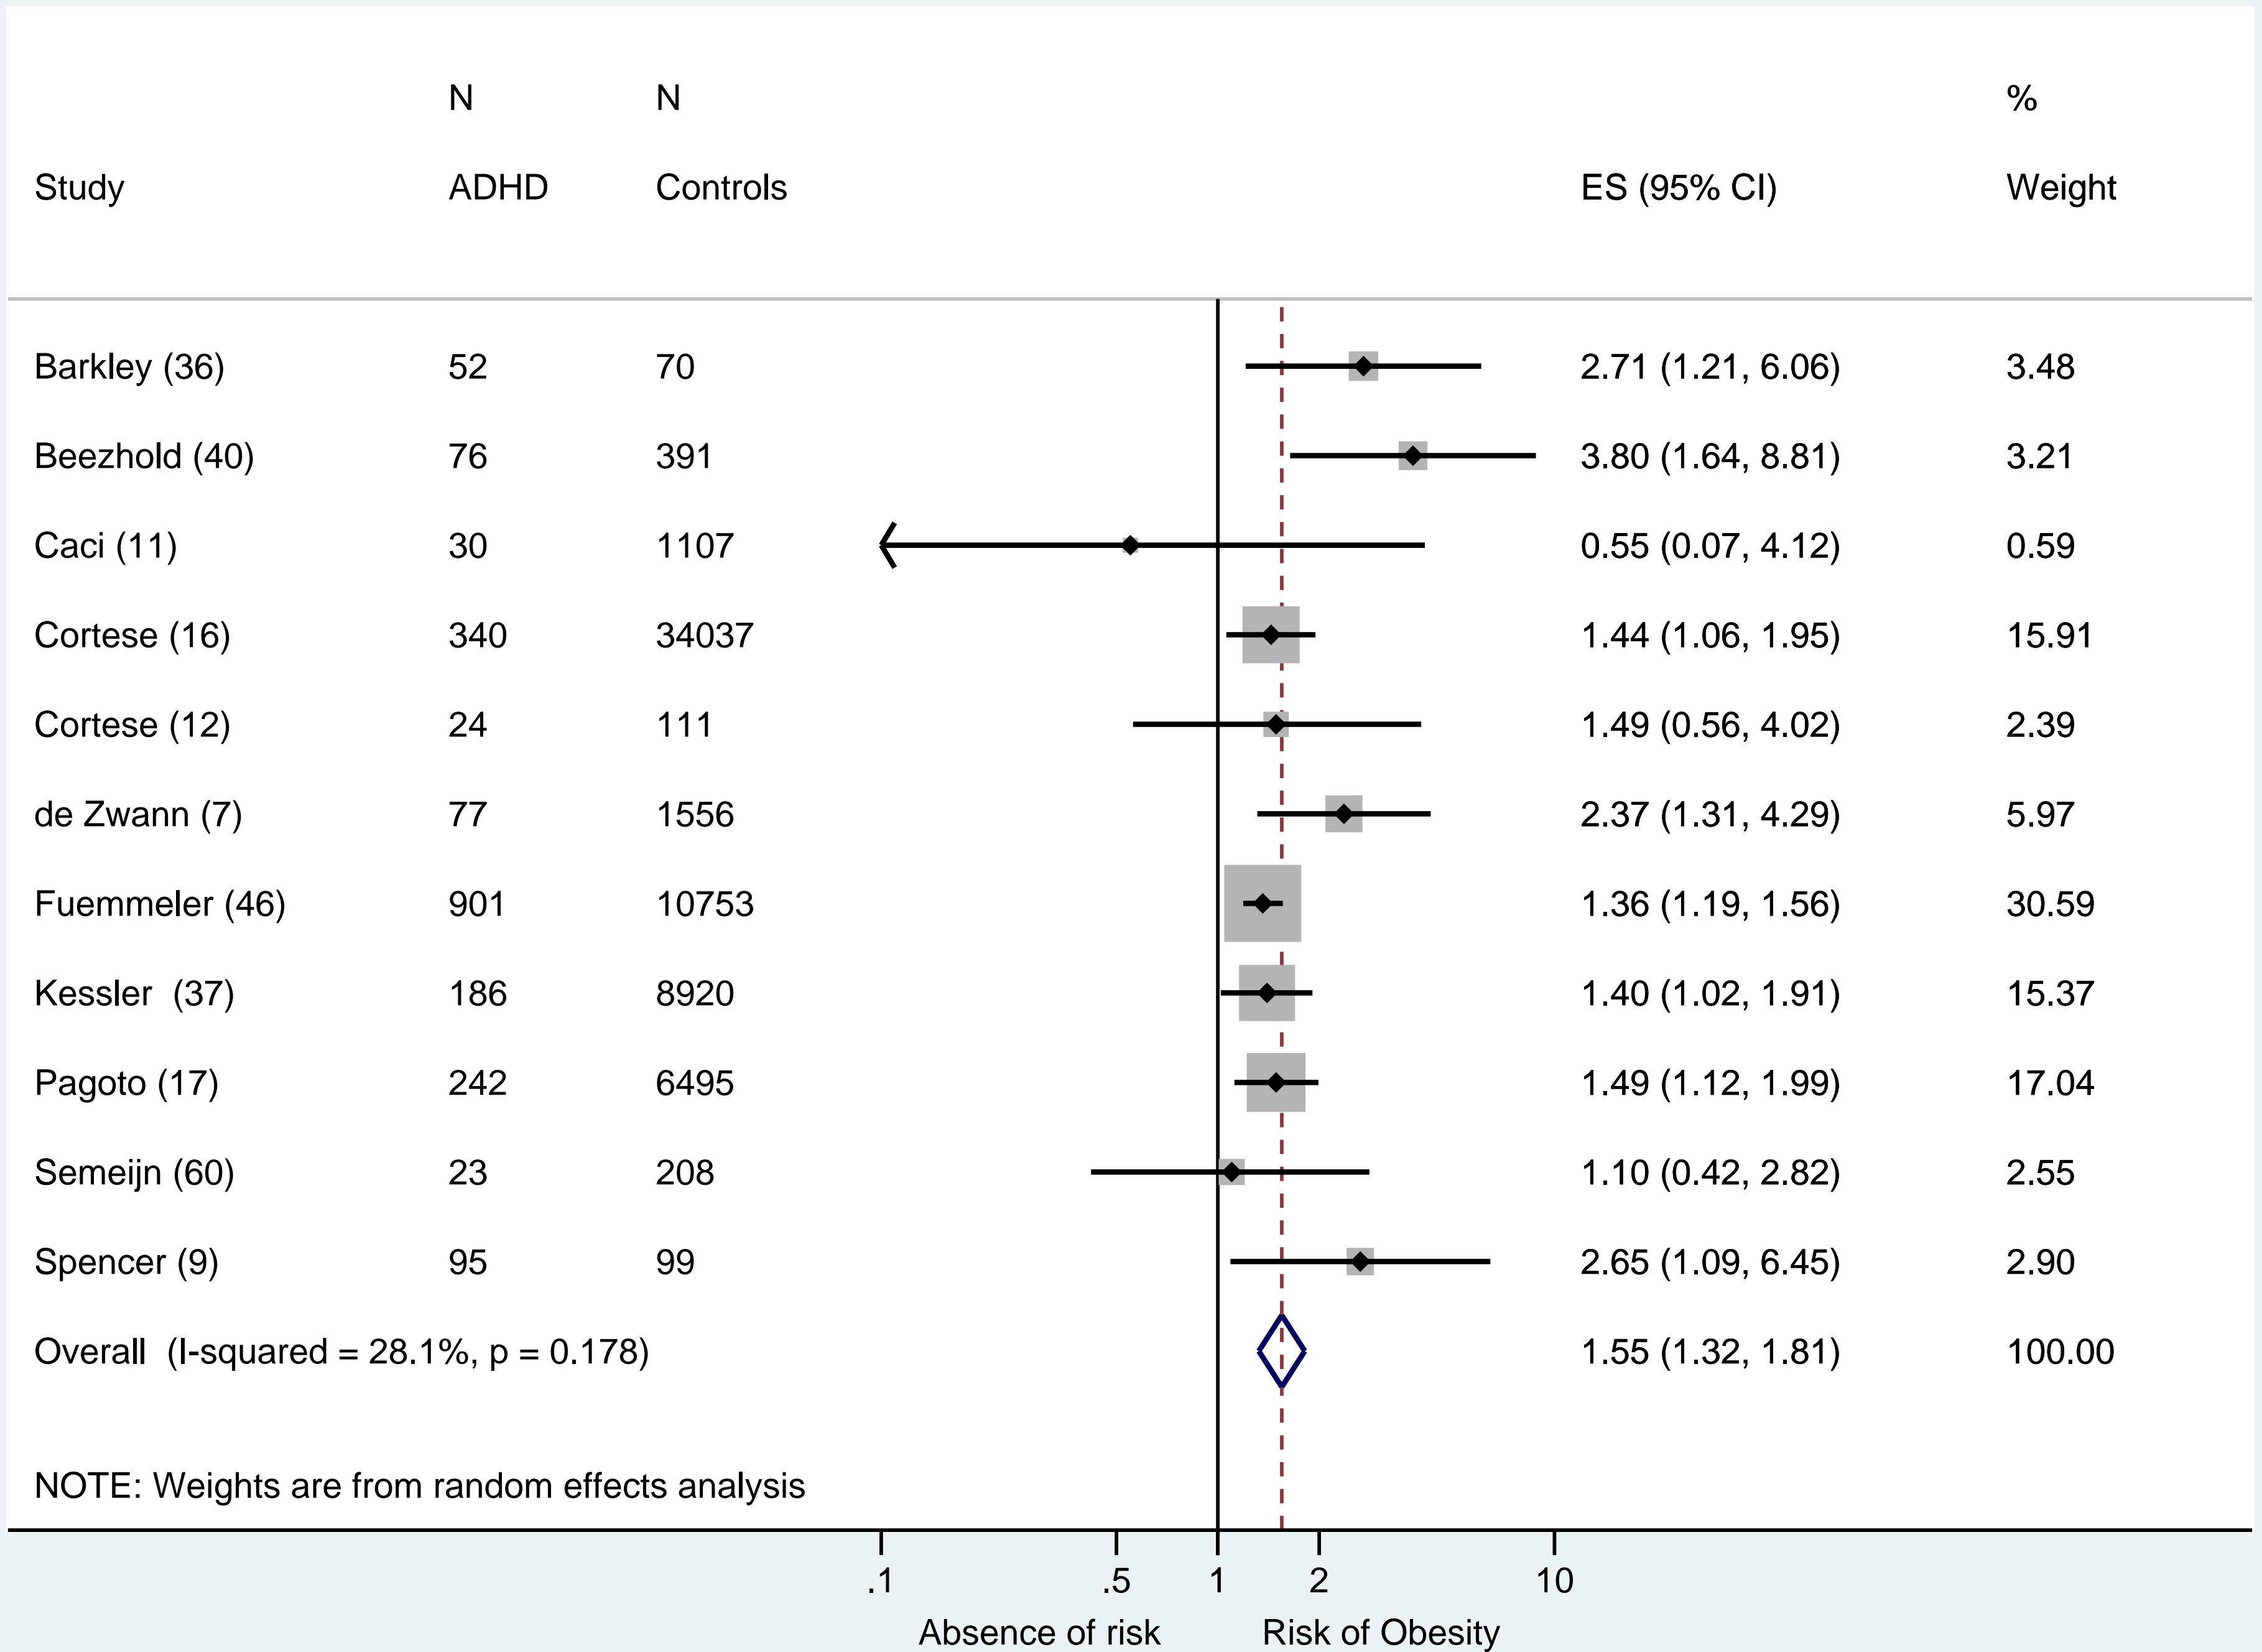

NOTE: Weights are from random effects analysis

\*The area of each square is proportional to the weight that the individual study contributed to the meta-analysis.

FIGURE S3. Forest Plot Showing the Results of the Subgroup Meta-Analysis of Studies With Formal Diagnosis of ADHD Only\*

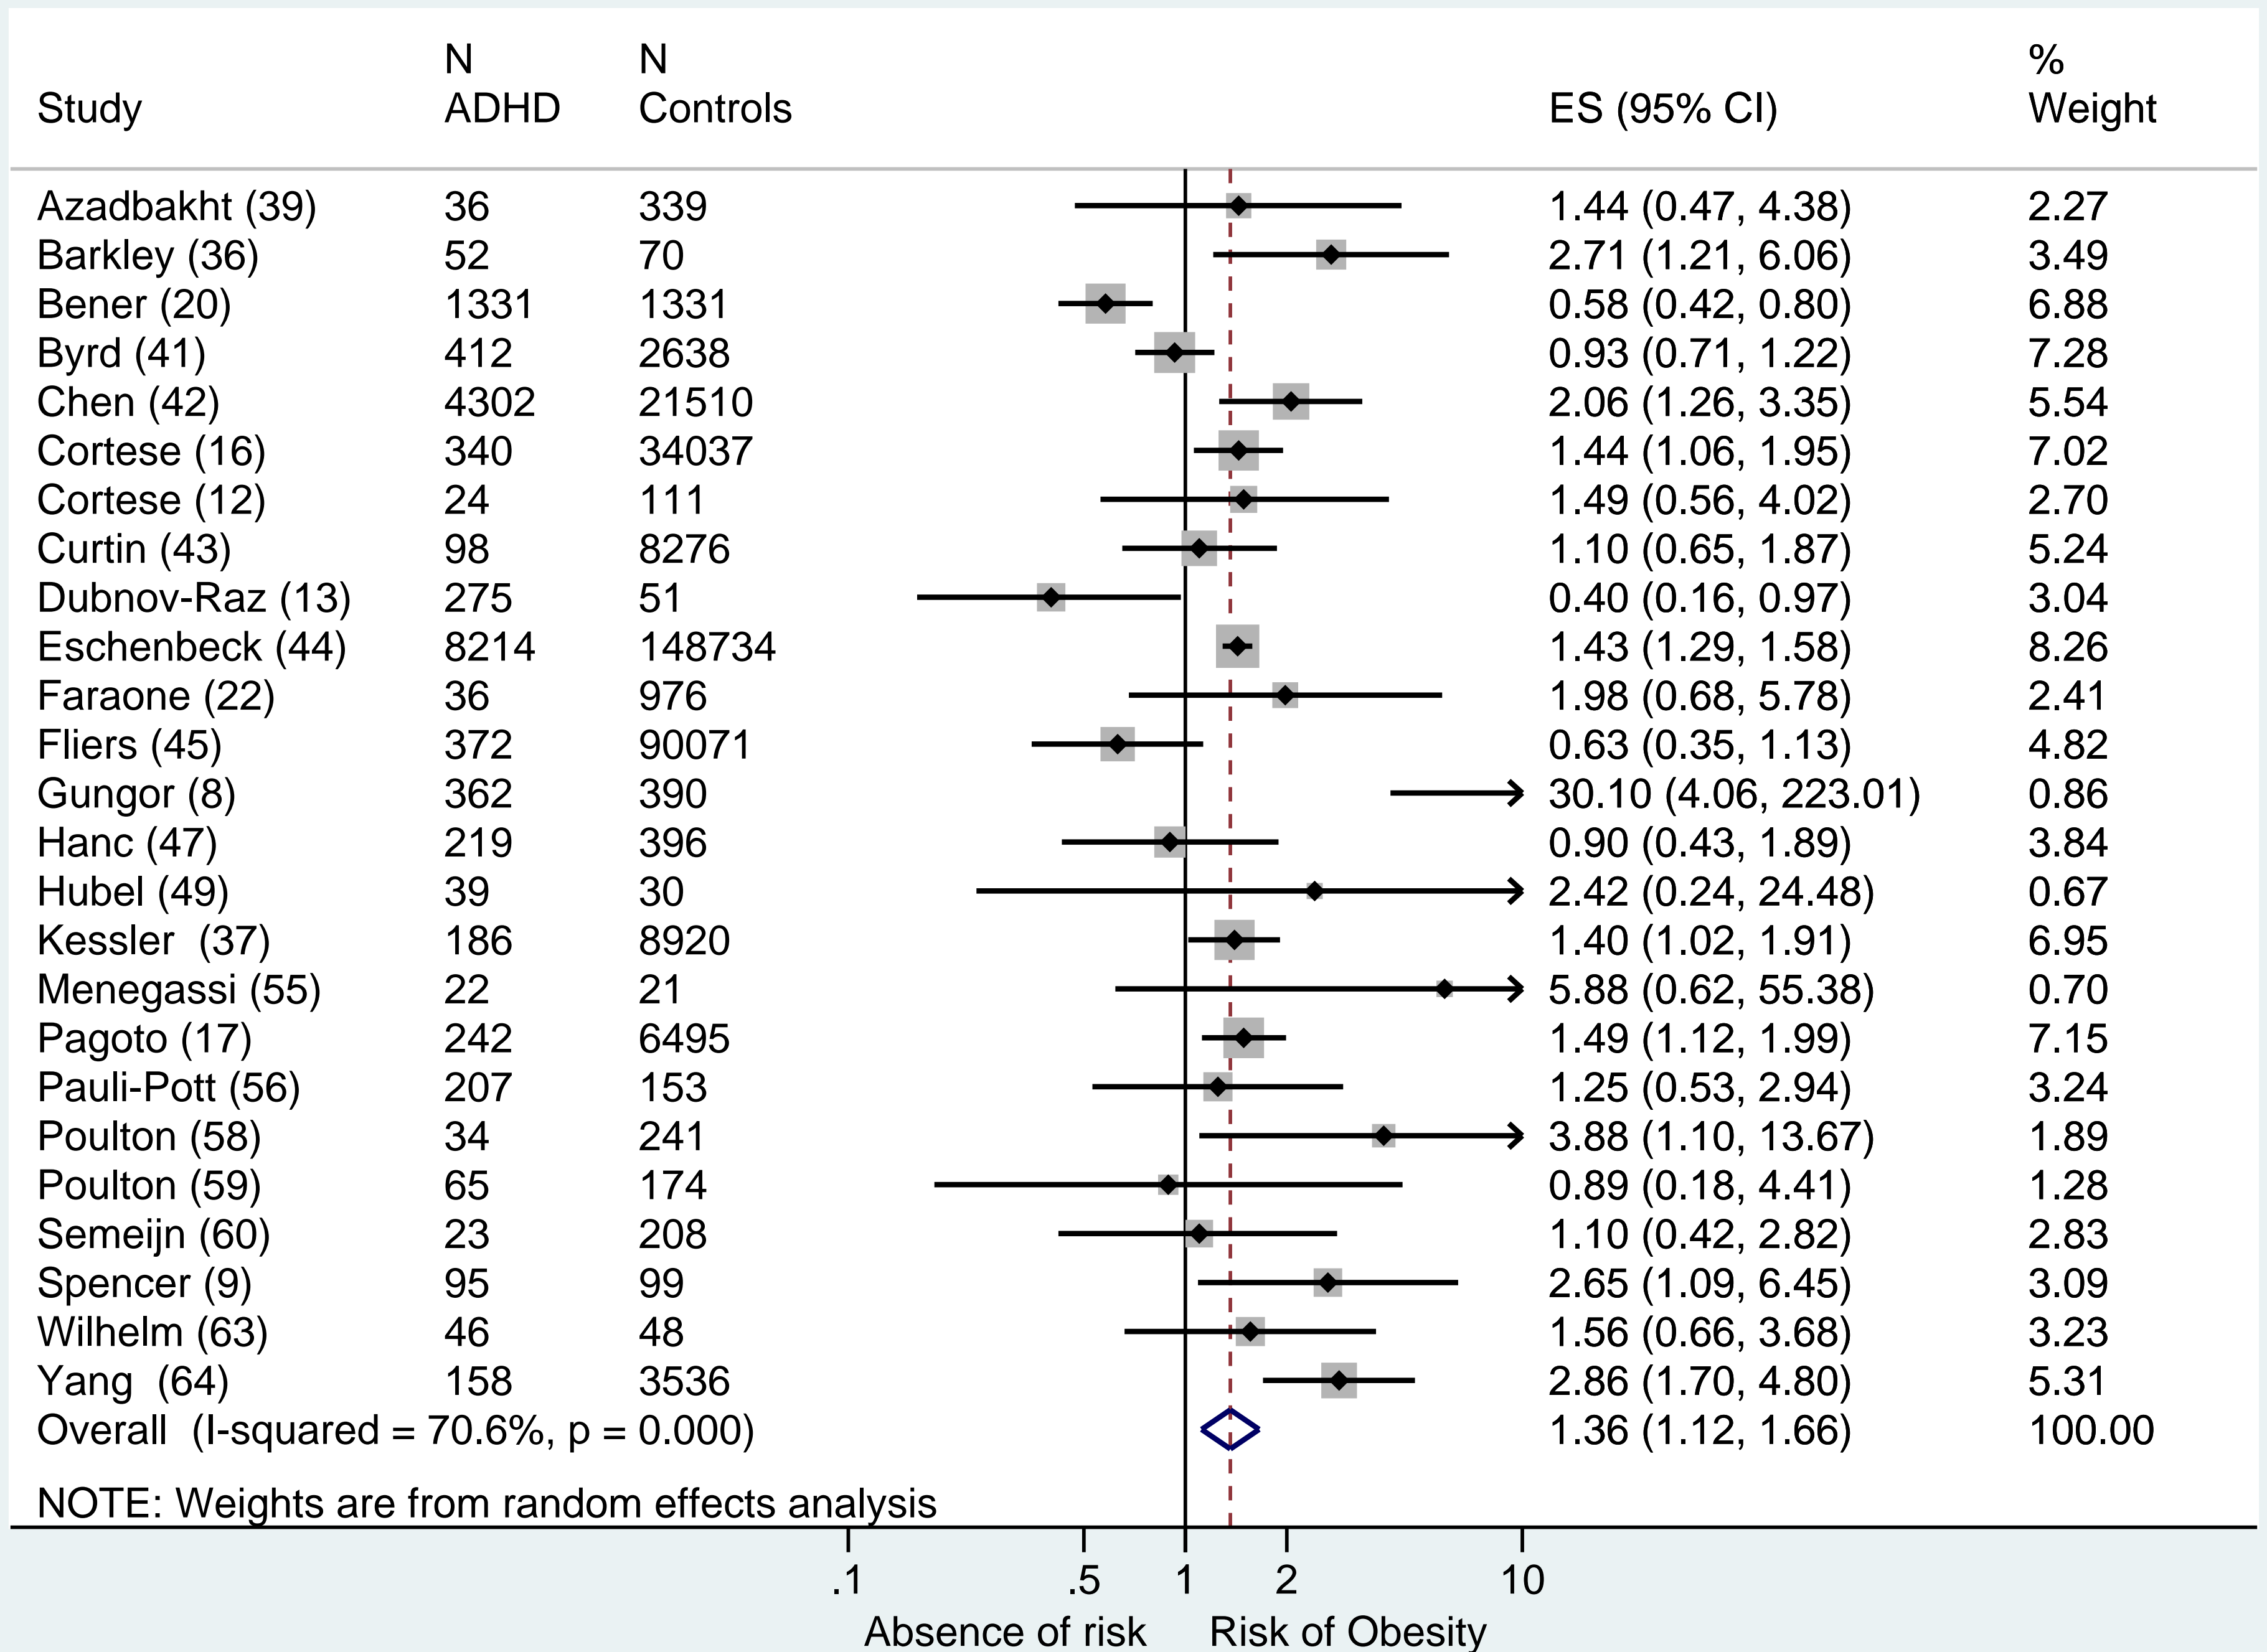

\*The area of each square is proportional to the weight that the individual study contributed to the meta-analysis.

FIGURE S4. Forest Plot Showing the Results of the Subgroup Meta-Analysis of Studies With Measured Height and Weight Only\*

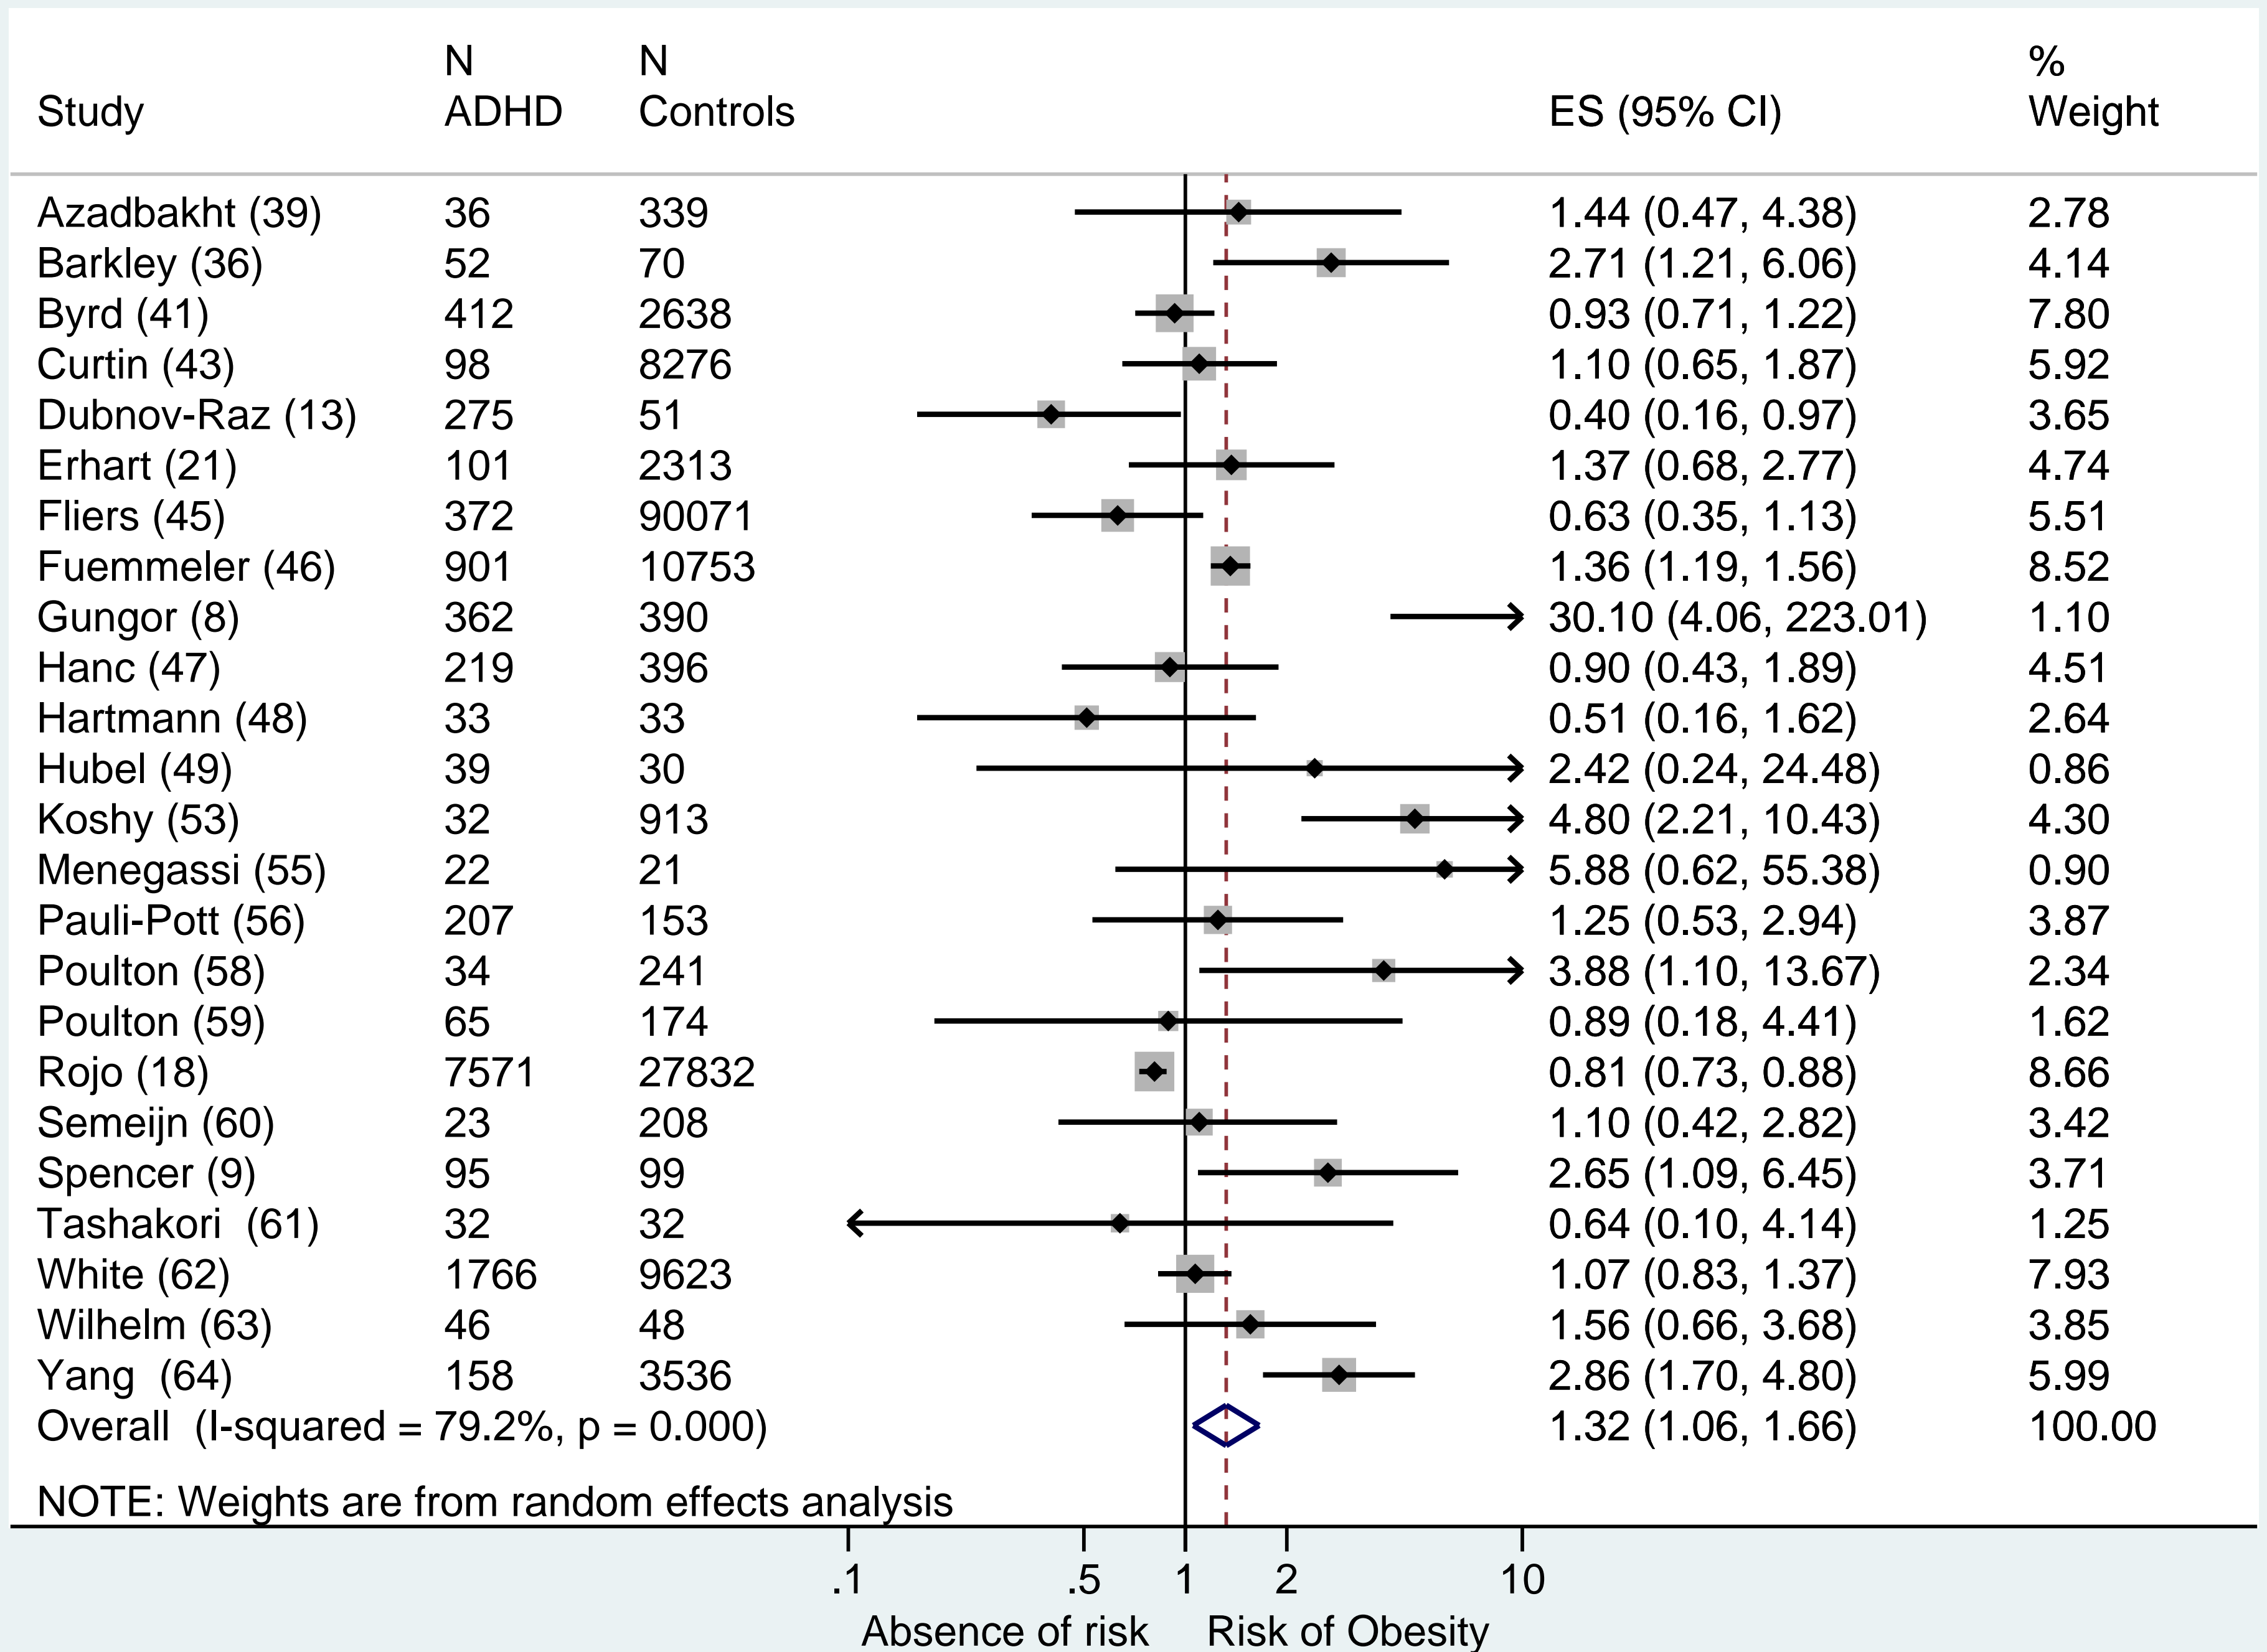

NOTE: Weights are from random effects analysis

\*The area of each square is proportional to the weight that the individual study contributed to the meta-analysis.



FIGURE S5. Forest Plot Showing the Results of the Subgroup Meta-Analysis of Population-Based Studies\*

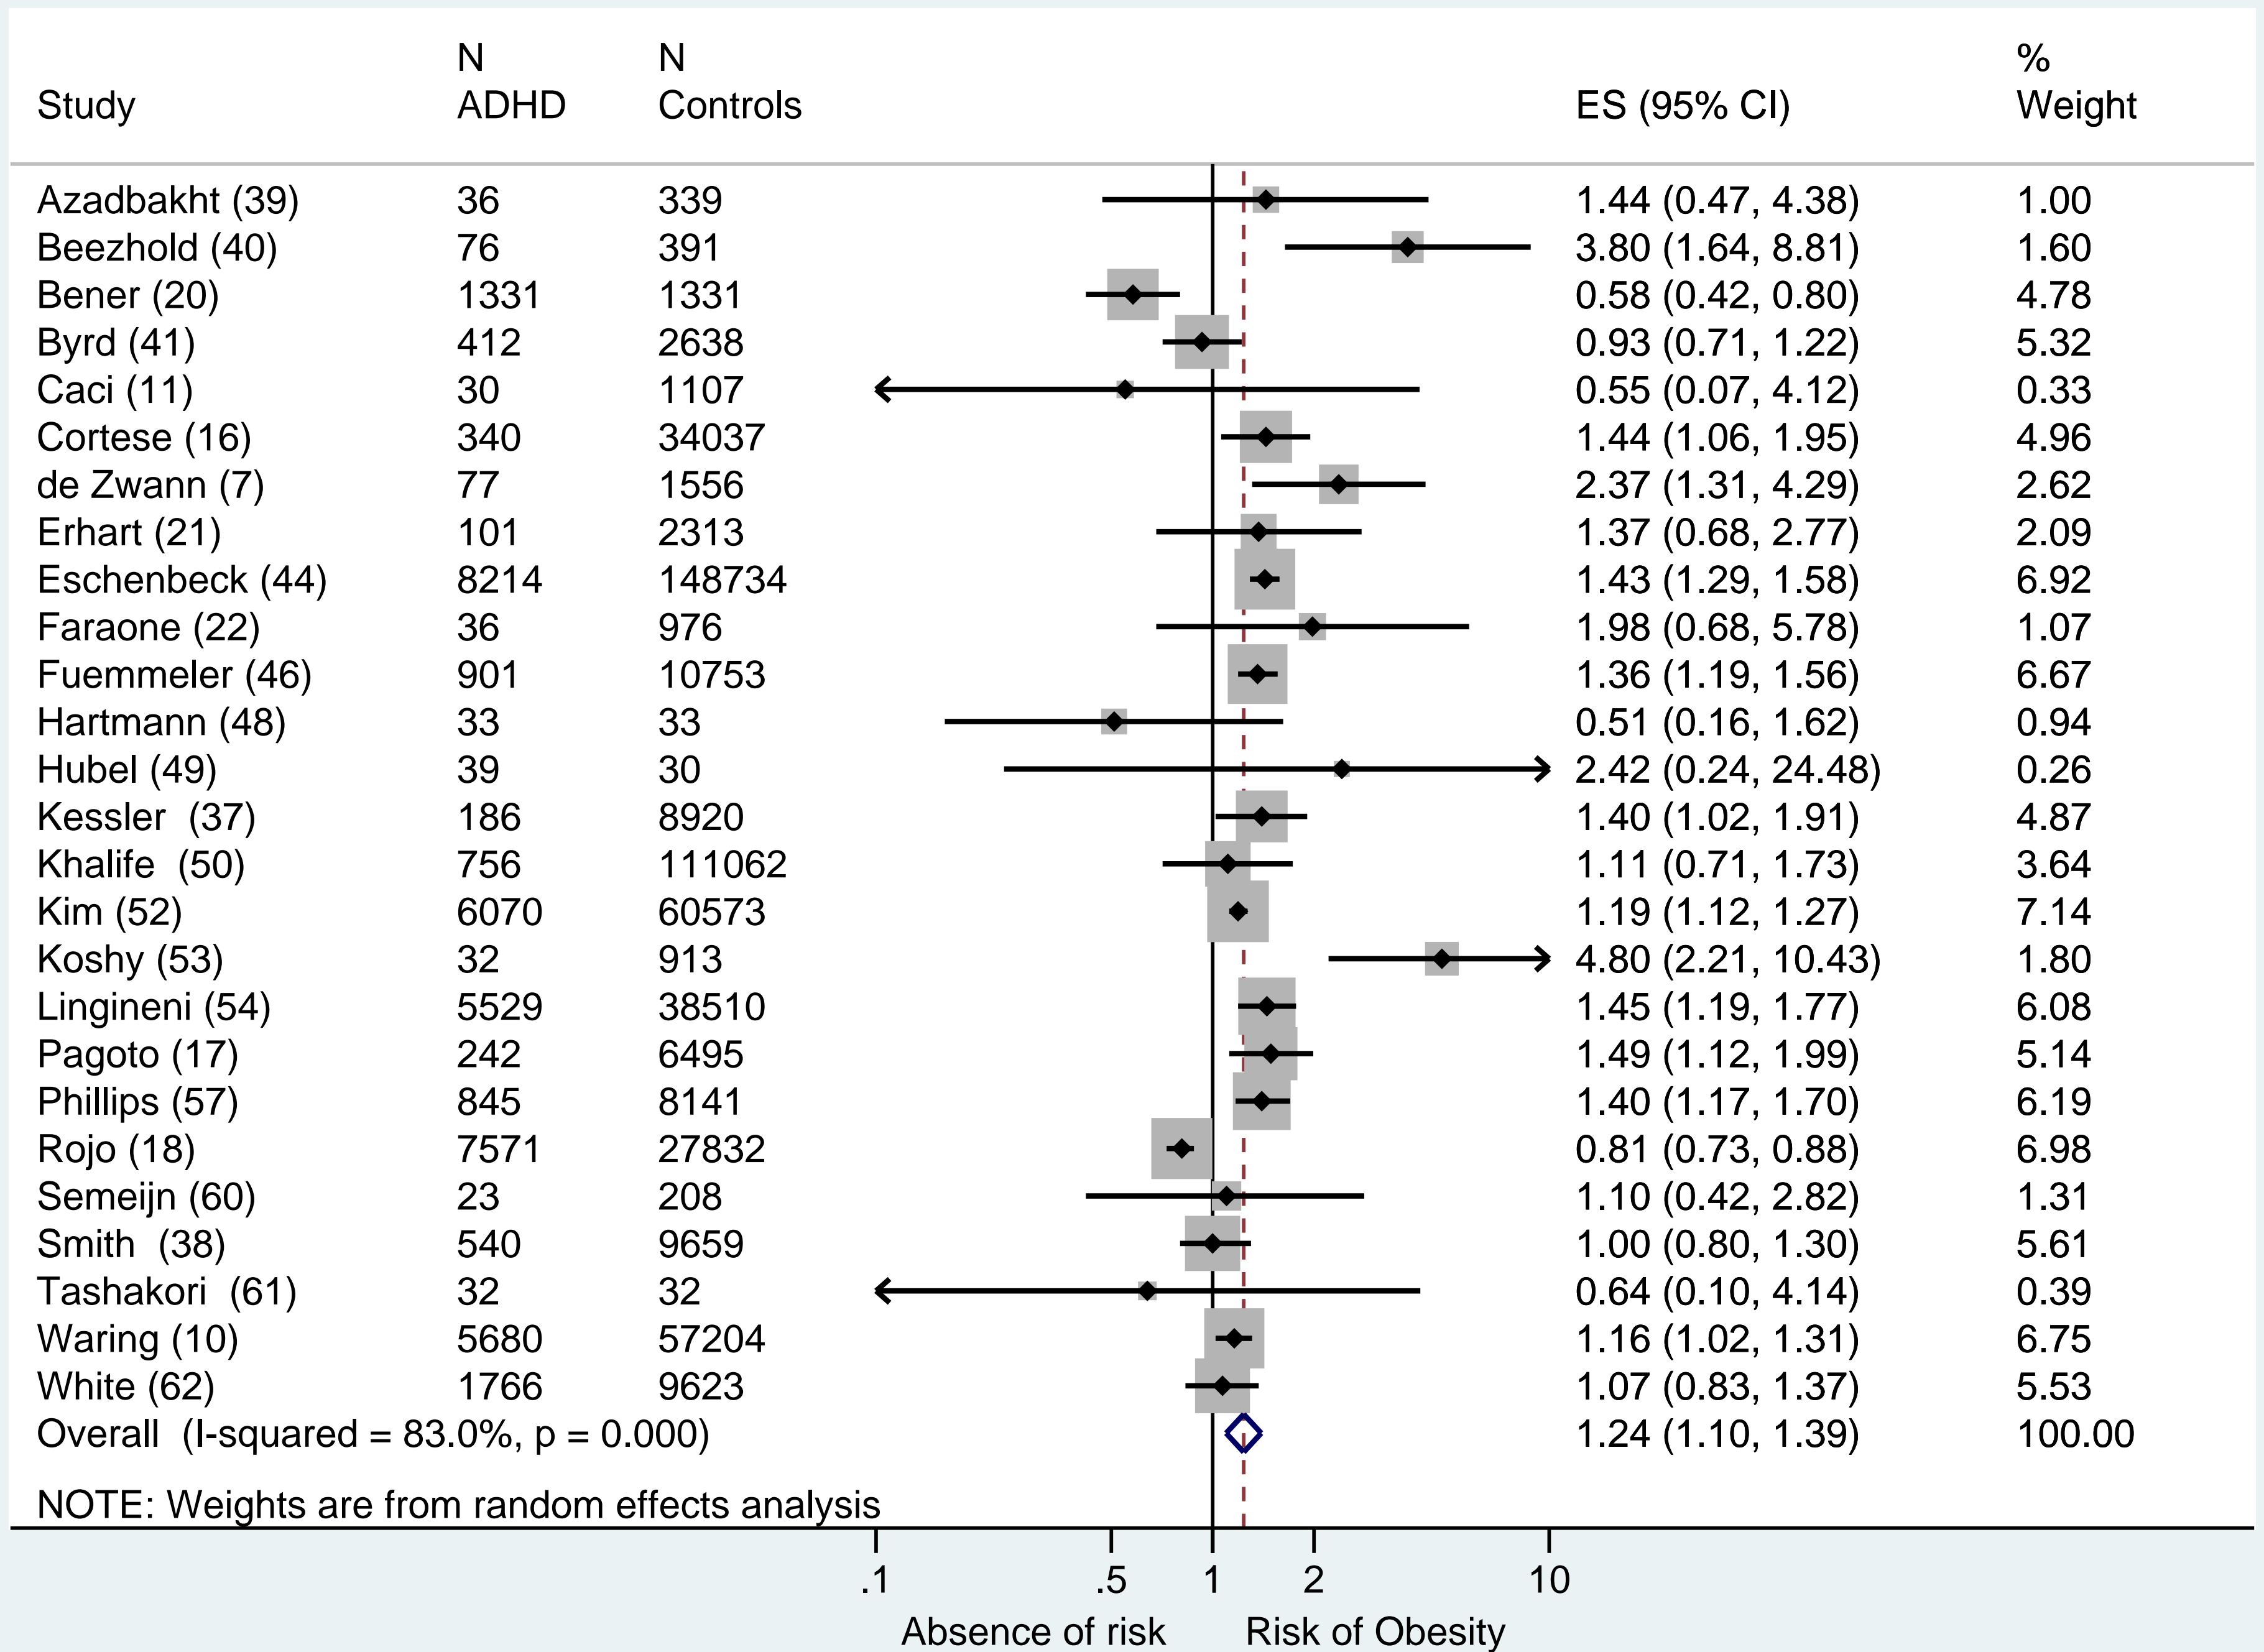

NOTE: Weights are from random effects analysis

\*The area of each square is proportional to the weight that the individual study contributed to the meta-analysis.

FIGURE S6. Forest Plot Showing the Results of the Subgroup Meta-Analysis of Clinical Studies\*

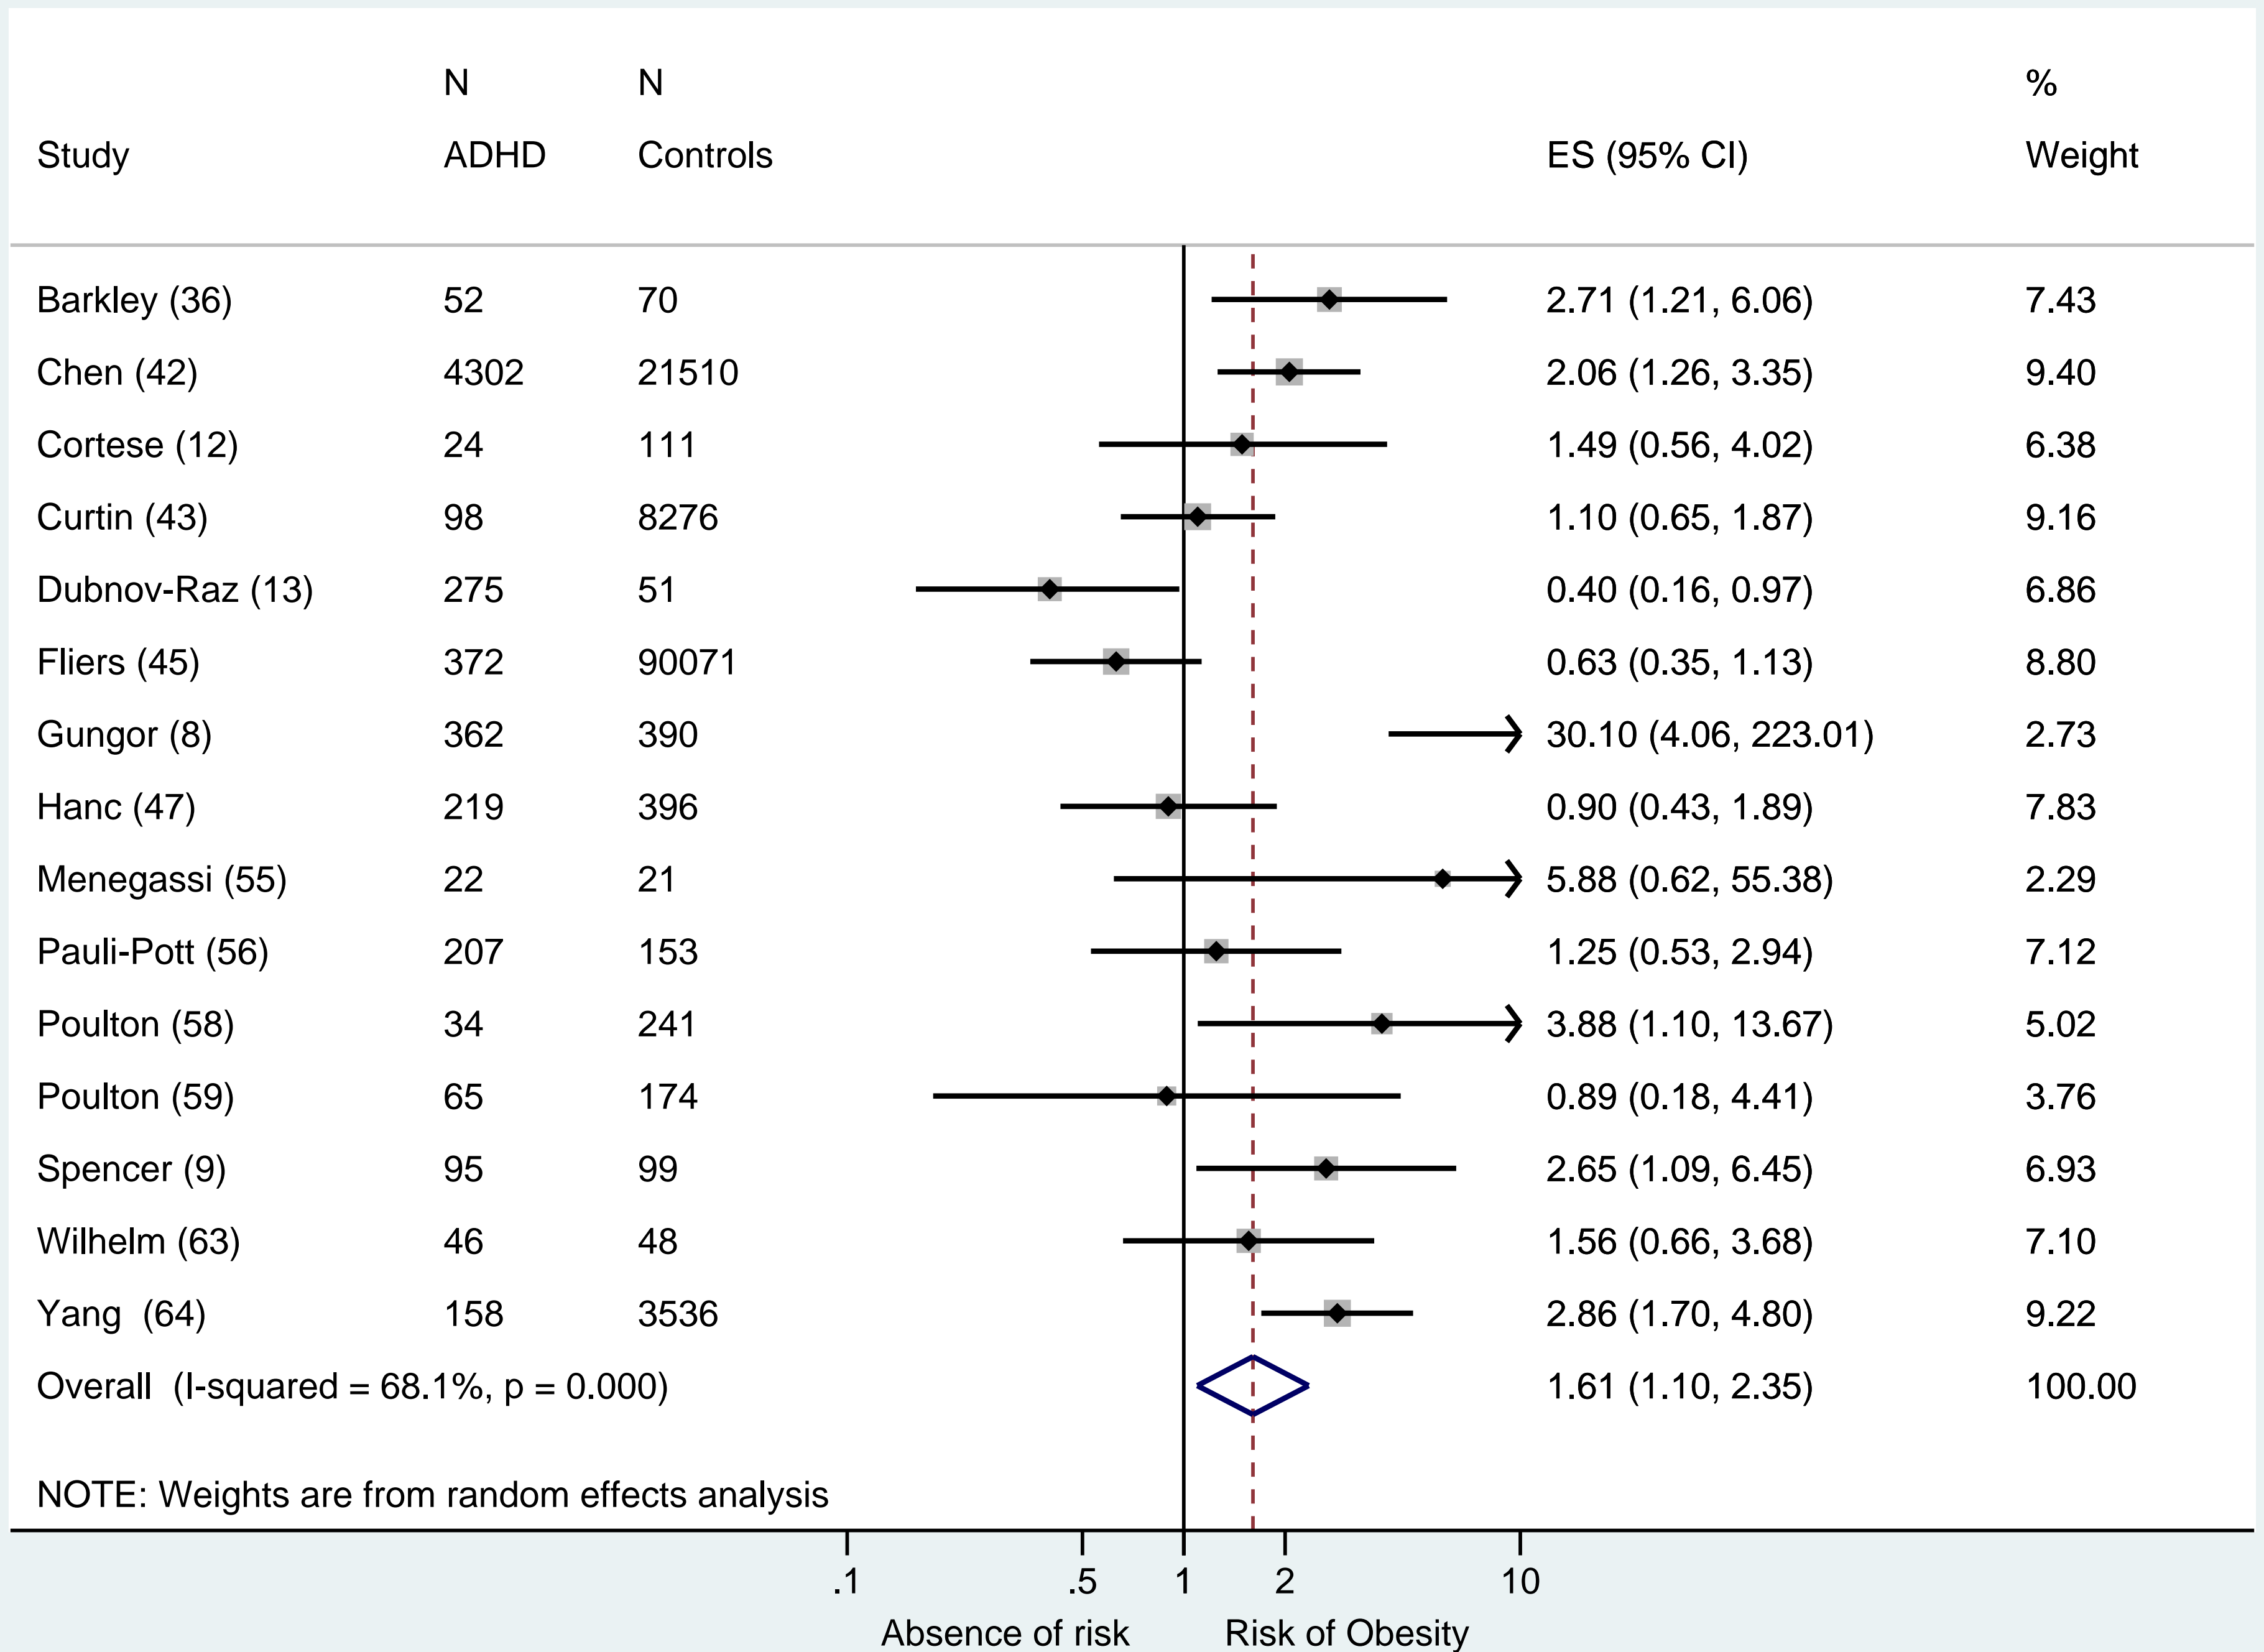

NOTE: Weights are from random effects analysis

\*The area of each square is proportional to the weight that the individual study contributed to the meta-analysis.

FIGURE S7. Forest Plot Showing the Results of the Subgroup Meta-Analysis of Studies With a Formal Diagnosis of ADHD and Direct Measures of Height and Weight\*

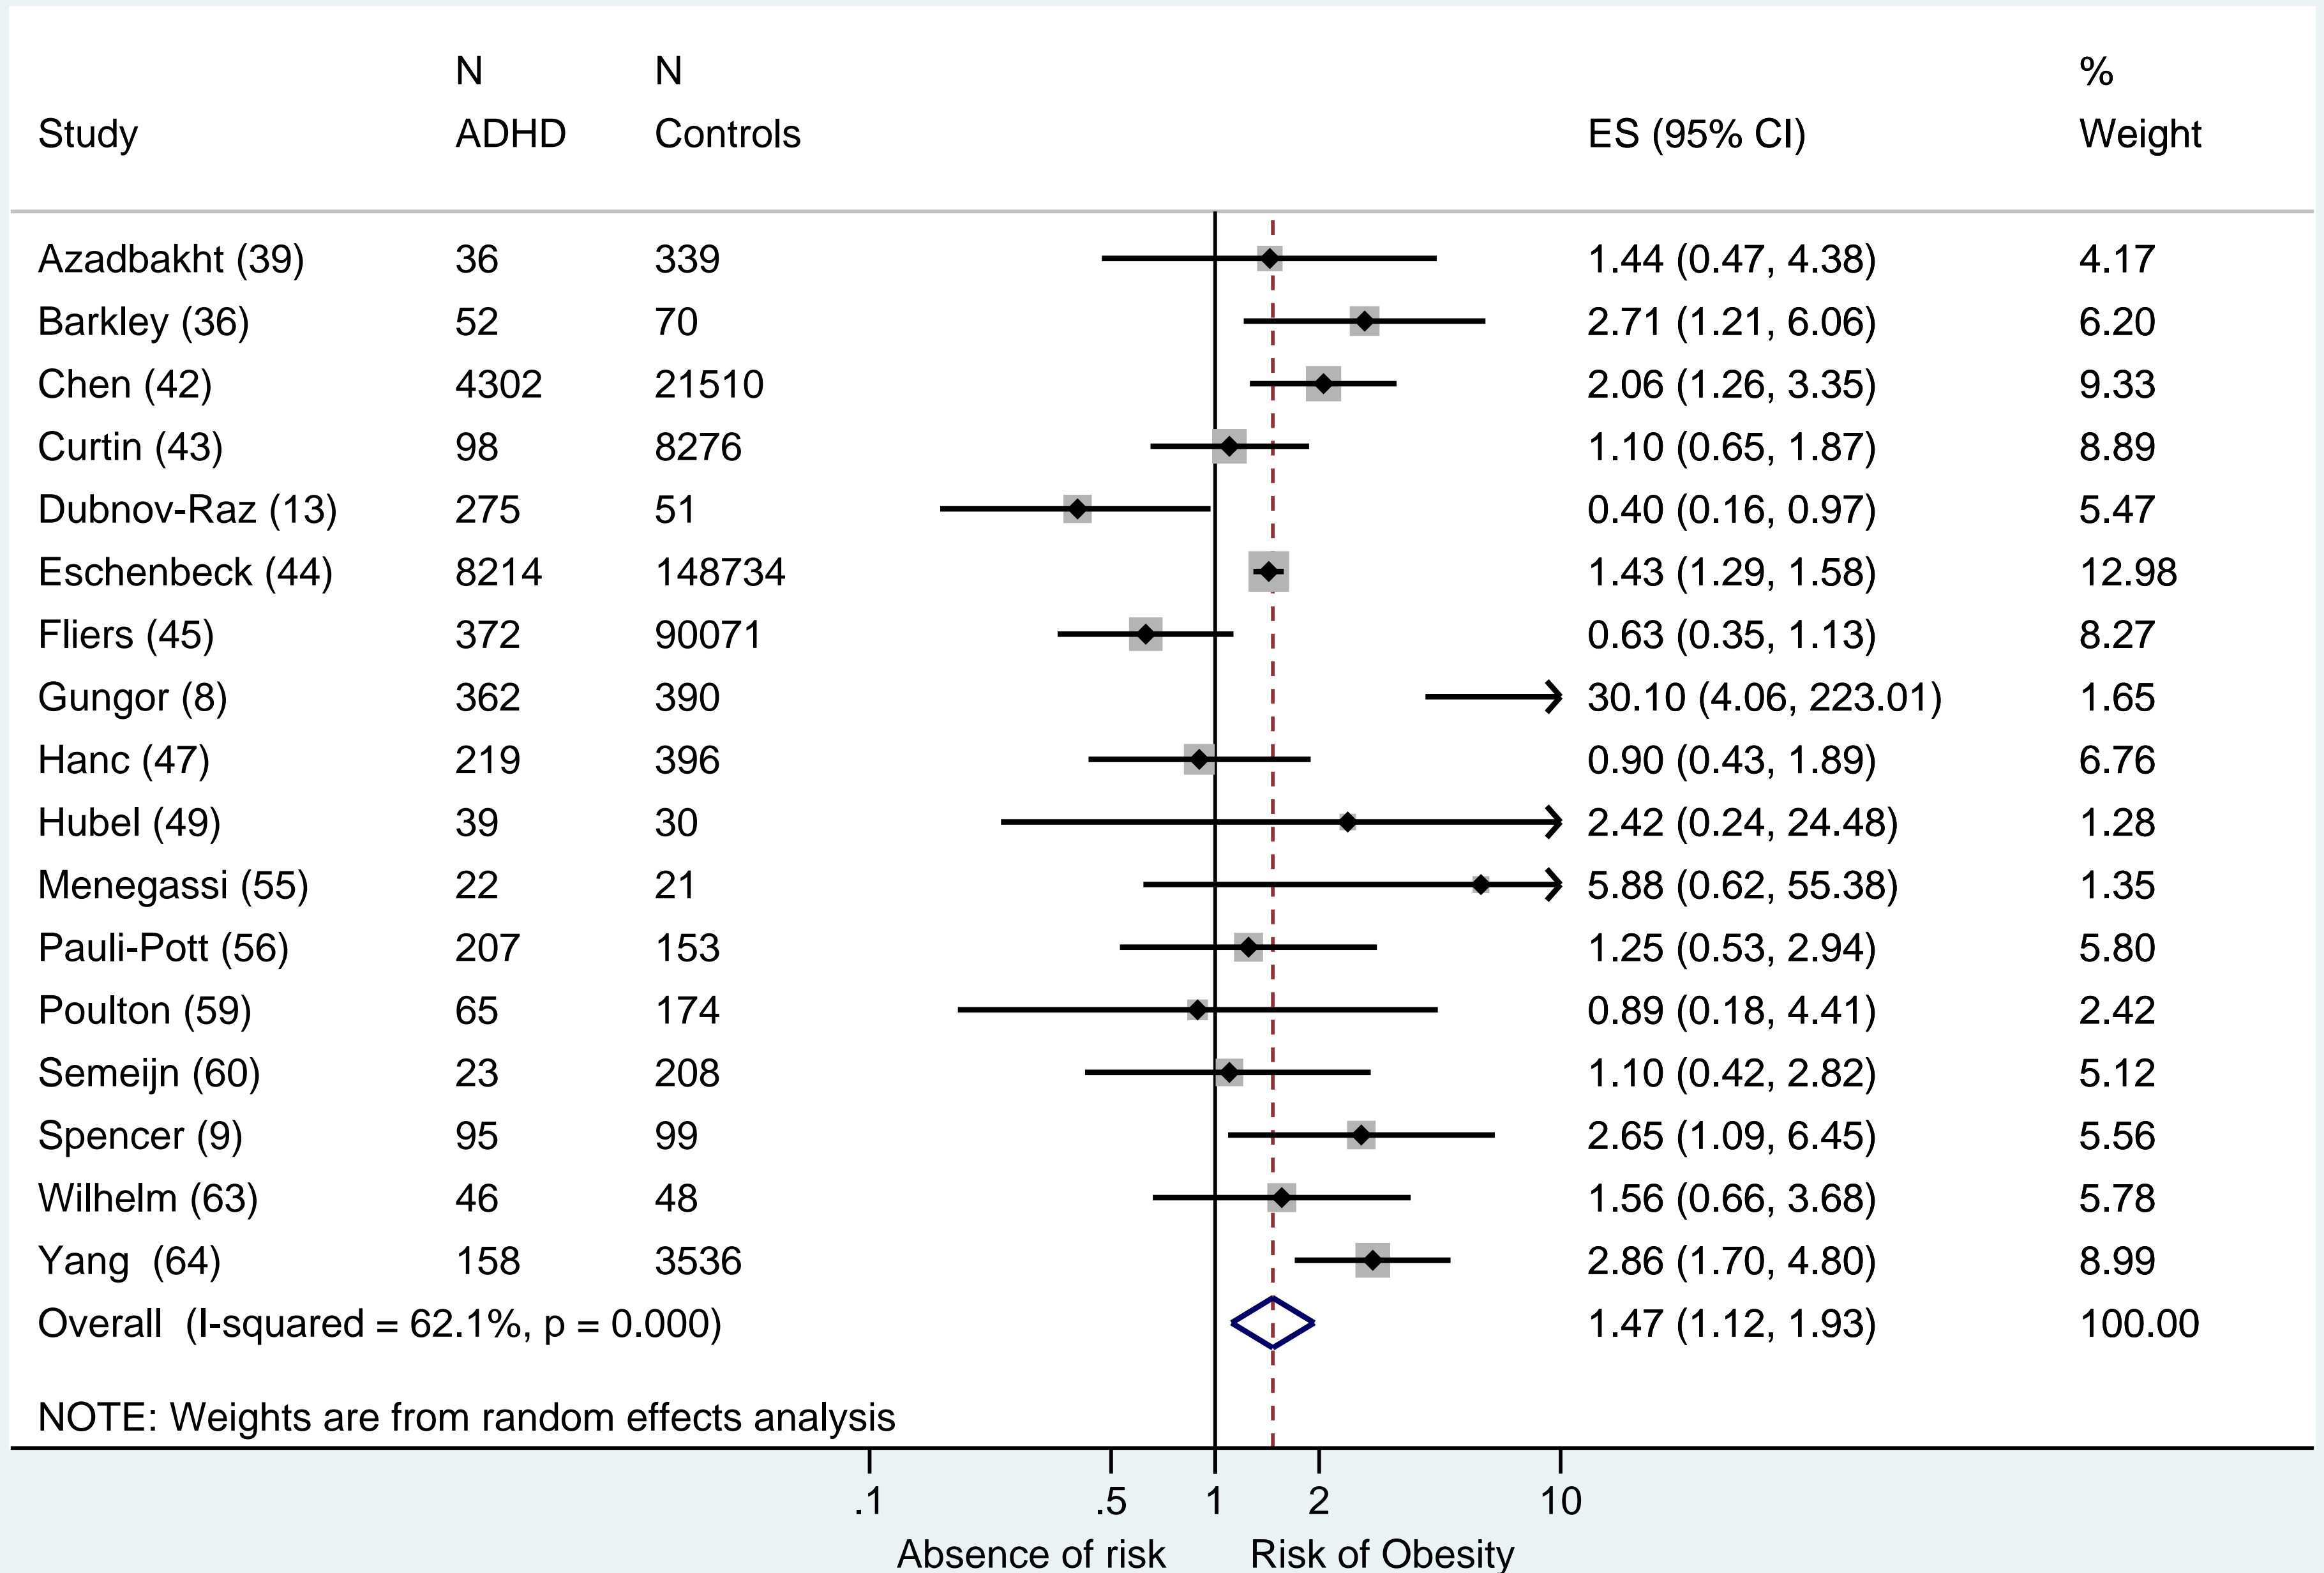

\*The area of each square is proportional to the weight that the individual study contributed to the meta-analysis.

FIGURE S8. Forest Plot Showing the Results of the Meta-Analysis of Studies Reporting the Association Between Overweight and ADHD\*

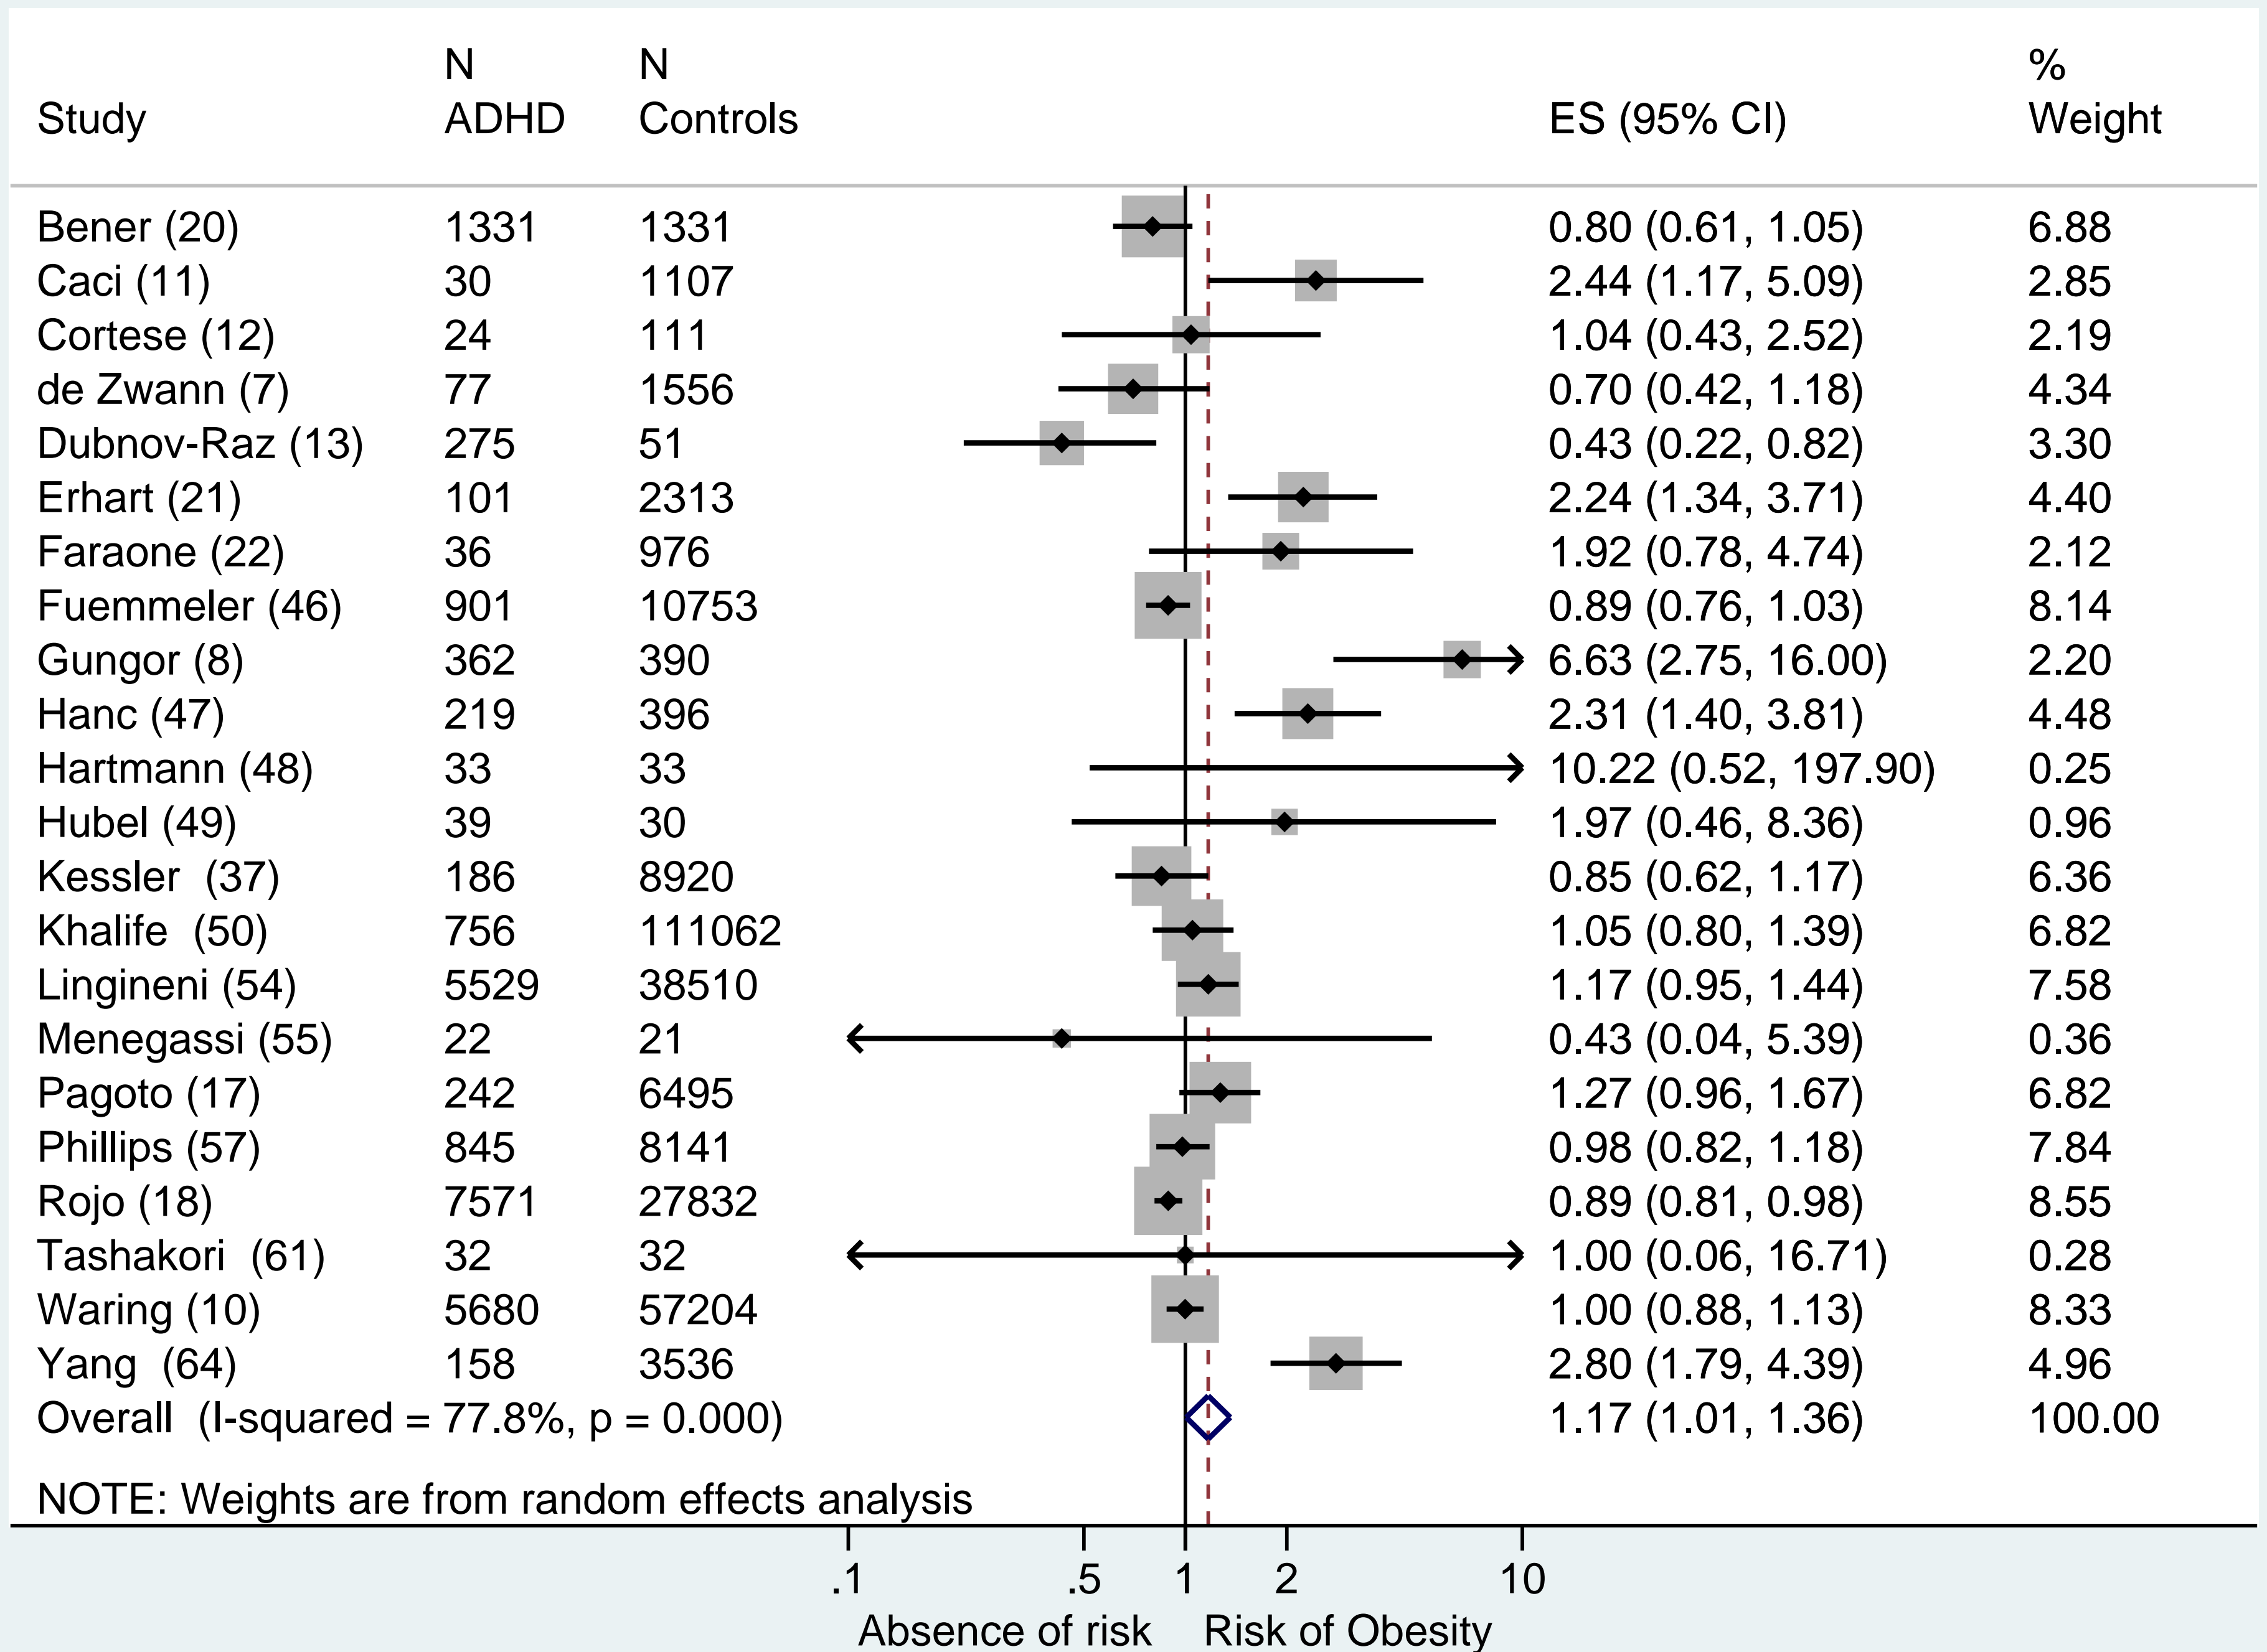

NOTE: Weights are from random effects analysis

\*The area of each square is proportional to the weight that the individual study contributed to the meta-analysis.
